# Supplementary material for: The Spatio-Temporal Distribution of the Freshwater Bivalves Corbicula fluminea and Dreissena polymorpha in the Lower Sector of the Danube River and the Danube Delta
Source: MDPI journal article supplement (doi:10.3390/su15118526), 2023-05-24
Supplement: s1 [file s1]

**Supplementary Materials S1.** The distribution of the freshwater bivalves *Corbicula fluminea* and *Dreissena polymorpha* on the Lower Danube River and Danube Delta (abundance, granulometry of sediments, carbon organic total).

| Crt. No. | Location                         | Station  | <i>C. fluminea</i> | <i>C. fluminea</i> juv. | <i>D. polymorpha</i> | <i>D. polymorpha</i> juv. | Gravel % | Sand % | Silt % | Clay % | TOC%  |
|----------|----------------------------------|----------|--------------------|-------------------------|----------------------|---------------------------|----------|--------|--------|--------|-------|
| 1.       | Km 1072 Bazias                   | D109-204 | 28                 | 0                       | 35                   | 0                         | 0        | 29.43  | 55.92  | 14.65  | 0.642 |
| 2.       | Km 1072 Bazias                   | D15-182  | 0                  | 170.2                   | 481                  | 0                         | 0        | 29.43  | 55.92  | 14.65  | 0.642 |
| 3.       | Km 1072 Bazias                   | D12-195  | 475.524            | 0                       | 951.048              | 0                         | 0        | 29.43  | 55.92  | 14.65  | 0.642 |
| 4.       | Km 1072 Bazias                   | D11-191  | 0                  | 0                       | 377.4                | 0                         | 0        | 29.43  | 55.92  | 14.65  | 0.642 |
| 5.       | Km 1072 Bazias                   | D10-143  | 2500               | 0                       | 0                    | 6250                      | 0        | 29.43  | 55.92  | 14.65  | 0.642 |
| 6.       | Km 1059 Belobresca               | D15-180  | 0                  | 0                       | 236.8                | 0                         | 0        | 51.98  | 35.62  | 12.4   | 1.311 |
| 7.       | Km 1059 Belobresca               | D10-039  | 111                | 0                       | 0                    | 0                         | 0        | 51.98  | 35.62  | 12.4   | 1.311 |
| 8.       | Km 1059 Belobresca               | D10-142  | 7031.25            | 0                       | 0                    | 937.5                     | 0        | 51.98  | 35.62  | 12.4   | 1.311 |
| 9.       | Km 1050 Moldova Veche            | D11-185  | 0                  | 0                       | 7.4                  | 0                         | 0        | 29.93  | 54.88  | 15.2   | 0.309 |
| 10.      | Km 1050 Moldova Veche            | D10-141  | 156.25             | 0                       | 0                    | 7031.25                   | 0        | 29.93  | 54.88  | 15.2   | 0.309 |
| 11.      | Km 1046 Moldova veche Downstream | D15-173  | 0                  | 251.6                   | 1354.2               | 0                         | 0        | 53.06  | 36.59  | 10.35  | 1.316 |
| 12.      | Km 1046 Moldova veche Downstream | D14-186  | 0                  | 14.8                    | 0                    | 88.8                      | 0        | 53.06  | 36.59  | 10.35  | 1.316 |
| 13.      | Km 1046 Moldova veche Downstream | D11-184  | 37                 | 0                       | 421.8                | 0                         | 0        | 53.06  | 36.59  | 10.35  | 1.316 |
| 14.      | Km 1046 Moldova veche Downstream | D10-140  | 0                  | 0                       | 0                    | 1250                      | 0        | 53.06  | 36.59  | 10.35  | 1.316 |
| 15.      | Km 1039 Papagaia                 | D15-170  | 0                  | 540.2                   | 1124.8               | 0                         | 0        | 5.81   | 73.19  | 21     | 1.421 |
| 16.      | Km 1039 Papagaia                 | D14-185  | 0                  | 0                       | 0                    | 148                       | 0        | 5.81   | 73.19  | 21     | 1.421 |
| 17.      | Km 1039 Papagaia                 | D14-183  | 0                  | 22.2                    | 0                    | 407                       | 0        | 5.81   | 73.19  | 21     | 1.421 |
| 18.      | Km 1039 Papagaia                 | D14-183  | 14.8               | 0                       | 185                  | 162.8                     | 0        | 5.81   | 73.19  | 21     | 1.421 |
| 19.      | Km 1039 Papagaia                 | D11-180  | 29.6               | 0                       | 14.8                 | 0                         | 0        | 5.81   | 73.19  | 21     | 1.421 |
| 20.      | Km 1039 Papagaia                 | D11-179  | 7.4                | 0                       | 81.4                 | 0                         | 0        | 5.81   | 73.19  | 21     | 1.421 |
| 21.      | Km 1039 Papagaia                 | D10-139  | 468.75             | 0                       | 0                    | 0                         | 0        | 5.81   | 73.19  | 21     | 1.421 |
| 22.      | km 974                           | D109-178 | 0                  | 0                       | 112                  | 0                         | 0        | 1.65   | 69.86  | 28.5   | 1.254 |
| 23.      | Km 965 Tabula Traiana            | D109-175 | 21                 | 0                       | 539                  | 0                         | 0        | 9.82   | 70.47  | 19.71  | 0.772 |

|     |                              |           |        |        |          |         |   |        |        |        |       |
|-----|------------------------------|-----------|--------|--------|----------|---------|---|--------|--------|--------|-------|
| 24. | Km 965 Tabula Traiana        | D10-132   | 156.25 | 0      | 0        | 781.25  | 0 | 9.82   | 70.47  | 19.71  | 0.772 |
| 25. | Km 957 Orsova                | D10-131   | 156.25 | 0      | 0        | 7656.25 | 0 | 2.19   | 68.81  | 29.01  | 0.599 |
| 26. | km 953.5 Cerna River         | D11-172   | 0      | 0      | 14.8     | 0       | 0 | 38.073 | 54.565 | 7.363  | 0.25  |
| 27. | Km 951 Downstream Orsova Bay | D109-163  | 28     | 0      | 2345     | 0       | 0 | 25     | 58.54  | 16.46  | 0.186 |
| 28. | Km 951 Downstream Orsova Bay | D15-163   | 0      | 0      | 902.8    | 0       | 0 | 25     | 58.54  | 16.46  | 0.186 |
| 29. | Km 951 Downstream Orsova Bay | D11-170   | 0      | 0      | 7422.2   | 0       | 0 | 25     | 58.54  | 16.46  | 0.186 |
| 30. | Km 951 Downstream Orsova Bay | D16-032   | 0      | 0      | 29.6     | 0       | 0 | 25     | 58.54  | 16.46  | 0.186 |
| 31. | Km 951 Downstream Orsova Bay | D109-162  | 35     | 0      | 777      | 0       | 0 | 25     | 58.54  | 16.46  | 0.186 |
| 32. | Km 951 Downstream Orsova Bay | D109-161  | 14     | 0      | 63       | 0       | 0 | 25     | 58.54  | 16.46  | 0.186 |
| 33. | Km 951 Downstream Orsova Bay | D10-128   | 0      | 0      | 0        | 1250    | 0 | 25     | 58.54  | 16.46  | 0.186 |
| 34. | Km 951 Downstream Orsova Bay | D10-127   | 0      | 0      | 30312.5  | 0       | 0 | 25     | 58.54  | 16.46  | 0.186 |
| 35. | Km. 947 Upstream Iron Gate I | D109-157  | 35     | 0      | 2072     | 0       | 0 | 14.6   | 63.14  | 22.26  | 0.698 |
| 36. | Km. 947 Upstream Iron Gate I | D13-094   | 14.8   | 0      | 0        | 0       | 0 | 14.6   | 63.14  | 22.26  | 0.698 |
| 37. | km 944                       | D109-153  | 14     | 0      | 581      | 0       | 0 | 1.104  | 69.757 | 29.139 | 0.721 |
| 38. | Km 942                       | D1-18-130 | 29.6   | 59.2   | 0        | 0       | 0 | 3.626  | 73.217 | 23.157 | 0.541 |
| 39. | Km 943                       | D2-18-138 | 0      | 0      | 103.6    | 0       | 0 | 3.626  | 73.217 | 23.157 | 0.541 |
| 40. | Km 940.5                     | D2-18-114 | 0      | 0      | 214.6    | 0       | 0 | 6.976  | 61.226 | 31.797 | 0.621 |
| 41. | Km 940                       | D2-18-111 | 0      | 0      | 51.8     | 0       | 0 | 1.94   | 68.53  | 29.53  | 0.493 |
| 42. | Km 941                       | D1-18-118 | 703    | 5631.4 | 0        | 0       | 0 | 1.94   | 68.53  | 29.53  | 0.493 |
| 43. | Km 939                       | D1-18-114 | 51.8   | 843.6  | 0        | 0       | 0 | 14.599 | 63.144 | 22.257 | 0.65  |
| 44. | Km 938                       | D2-18-122 | 22.2   | 0      | 259      | 0       | 0 | 10.54  | 68.815 | 20.644 | 0.854 |
| 45. | Km 937 Gura Vaii             | D1-18-103 | 932.4  | 954.6  | 0        | 0       | 0 | 6.98   | 61.23  | 31.8   | 0.083 |
| 46. | Km 937 Gura Vaii             | D2-18-098 | 0      | 0      | 244.2    | 0       | 0 | 6.98   | 61.23  | 31.8   | 0.083 |
| 47. | Km 937 Gura Vaii             | D109-150  | 7      | 0      | 231      | 0       | 0 | 6.98   | 61.23  | 31.8   | 0.083 |
| 48. | Km 937 Gura Vaii             | D109-148  | 84     | 0      | 133      | 0       | 0 | 6.98   | 61.23  | 31.8   | 0.083 |
| 49. | Km 937 Gura Vaii             | D15-155   | 7.4    | 0      | 947.2    | 0       | 0 | 6.98   | 61.23  | 31.8   | 0.083 |
| 50. | Km 937 Gura Vaii             | D15-154   | 0      | 0      | 902.8    | 0       | 0 | 6.98   | 61.23  | 31.8   | 0.083 |
| 51. | Km 937 Gura Vaii             | D15-155   | 0      | 7.4    | 947.2    | 0       | 0 | 6.98   | 61.23  | 31.8   | 0.083 |
| 52. | Km 937 Gura Vaii             | D12-167   | 52.836 | 0      | 6287.484 | 0       | 0 | 6.98   | 61.23  | 31.8   | 0.083 |

|     |                              |           |         |        |          |        |      |        |        |        |       |
|-----|------------------------------|-----------|---------|--------|----------|--------|------|--------|--------|--------|-------|
| 53. | Km 937 Gura Vaii             | D11-163   | 14.8    | 0      | 5194.8   | 0      | 0    | 6.98   | 61.23  | 31.8   | 0.083 |
| 54. | Km 937 Gura Vaii             | D11-164   | 44.4    | 0      | 1302.4   | 0      | 0    | 6.98   | 61.23  | 31.8   | 0.083 |
| 55. | Km 937 Gura Vaii             | D10-124   | 625     | 0      | 4375     | 3437.5 | 0    | 6.98   | 61.23  | 31.8   | 0.083 |
| 56. | Km 936                       | D1-18-094 | 0       | 4943.2 | 0        | 0      | 0    | 12.655 | 67.696 | 19.649 | 0.756 |
| 57. | Km 929 Turnu Severin         | D109-146  | 14      | 0      | 210      | 0      | 6.44 | 90.14  | 3.17   | 0.25   | 0.083 |
| 58. | Km 929 Turnu Severin         | D15-150   | 0       | 0      | 562.4    | 0      | 6.44 | 90.14  | 3.17   | 0.25   | 0.083 |
| 59. | Km 929 Turnu Severin         | D14-166   | 0       | 0      | 66.6     | 0      | 6.44 | 90.14  | 3.17   | 0.25   | 0.083 |
| 60. | Km 929 Turnu Severin         | D 12-165  | 0       | 0      | 123.876  | 0      | 6.44 | 90.14  | 3.17   | 0.25   | 0.083 |
| 61. | Km 929 Turnu Severin         | D11-161   | 0       | 0      | 14.8     | 0      | 6.44 | 90.14  | 3.17   | 0.25   | 0.083 |
| 62. | Km 929 Turnu Severin         | D10-123   | 1562.5  | 0      | 2656.25  | 468.75 | 6.44 | 90.14  | 3.17   | 0.25   | 0.083 |
| 63. | Km 924 Simian                | D15-148   | 0       | 0      | 347.8    | 0      | 0    | 78.73  | 15.44  | 5.84   | 0.094 |
| 64. | Km 924 Simian                | D15-147   | 0       | 0      | 643.8    | 0      | 0    | 78.73  | 15.44  | 5.84   | 0.094 |
| 65. | Km 924 Simian                | D10-121   | 312.5   | 0      | 937.5    | 0      | 0    | 78.73  | 15.44  | 5.84   | 0.094 |
| 66. | Km 924 Simian                | D14-160   | 0       | 0      | 14.8     | 0      | 0    | 78.73  | 15.44  | 5.84   | 0.094 |
| 67. | Km 924 Simian                | D13-083   | 7.4     | 0      | 81.4     | 0      | 0    | 78.73  | 15.44  | 5.84   | 0.094 |
| 68. | Km 924 Simian                | D11-156   | 37      | 22.2   | 569.8    | 148    | 0    | 78.73  | 15.44  | 5.84   | 0.094 |
| 69. | Km 924 Simian                | D11-157   | 14.8    | 0      | 666      | 273.8  | 0    | 78.73  | 15.44  | 5.84   | 0.094 |
| 70. | Km 924 Simian                | D10-121   | 1718.75 | 0      | 3437.5   | 0      | 0    | 78.73  | 15.44  | 5.84   | 0.094 |
| 71. | Km 866 Upstream Iron Gate II | D109-140  | 0       | 0      | 406      | 0      | 0    | 10.54  | 68.82  | 20.64  | 0.112 |
| 72. | Km 866 Upstream Iron Gate II | D15-144   | 0       | 0      | 1124.8   | 0      | 0    | 10.54  | 68.82  | 20.64  | 0.112 |
| 73. | Km 866 Upstream Iron Gate II | D14-157   | 0       | 0      | 88.8     | 0      | 0    | 10.54  | 68.82  | 20.64  | 0.112 |
| 74. | Km 866 Upstream Iron Gate II | D13-080   | 0       | 0      | 7.4      | 0      | 0    | 10.54  | 68.82  | 20.64  | 0.112 |
| 75. | Km 866 Upstream Iron Gate II | D 12- 157 | 317.016 | 0      | 4860.912 | 0      | 0    | 10.54  | 68.82  | 20.64  | 0.112 |
| 76. | Km 866 Upstream Iron Gate II | D11-153   | 22.2    | 14.8   | 273.8    | 74     | 0    | 10.54  | 68.82  | 20.64  | 0.112 |
| 77. | Km 866 Upstream Iron Gate II | D11-153   | 281.2   | 170.2  | 1480     | 148    | 0    | 10.54  | 68.82  | 20.64  | 0.112 |
| 78. | Km 866 Upstream Iron Gate II | D10-120   | 9062.5  | 0      | 22343.75 | 0      | 0    | 10.54  | 68.82  | 20.64  | 0.112 |
| 79. | Km 845.5 Gura Timokului      | D10-119   | 781.25  | 0      | 0        | 0      | 0    | 96.064 | 3.468  | 0.468  | 0.45  |
| 80. | km 824.5                     | D3-17-034 | 0       | 259    | 0        | 0      | 1.01 | 98.99  | 0      | 0      | 0.135 |
| 81. | Km 824 Jasen (BG)            | D10-117   | 0       | 312.5  | 0        | 0      | 0    | 98.729 | 1.143  | 0.128  | 0.65  |

|      |                           |           |       |        |        |        |       |       |       |       |       |
|------|---------------------------|-----------|-------|--------|--------|--------|-------|-------|-------|-------|-------|
| 82.  | km 824                    | D3-17-031 | 14.8  | 562.4  | 0      | 7.4    | 5.77  | 94.23 | 0     | 0     | 0.11  |
| 83.  | km 823.5                  | D3-17-028 | 0     | 59.2   | 0      | 0      | 0.97  | 99.03 | 0     | 0     | 0.22  |
| 84.  | km 823                    | D3-17-025 | 0     | 29.6   | 0      | 0      | 48.67 | 51.33 | 0     | 0     | 0.11  |
| 85.  | km 822.5                  | D3-17-022 | 0     | 22.2   | 0      | 0      | 0     | 100   | 0     | 0     | 0.07  |
| 86.  | km 821.5                  | D3-17-016 | 0     | 7.4    | 0      | 0      | 0     | 100   | 0     | 0     | 0.55  |
| 87.  | km 821                    | D3-17-013 | 0     | 44.4   | 0      | 0      | 61.97 | 38.03 | 0     | 0     | 0.19  |
| 88.  | km 820                    | D3-17-007 | 0     | 1073   | 0      | 0      | 0     | 100   | 0     | 0     | 0.23  |
| 89.  | Km 819.5                  | D3-17-004 | 7.4   | 111    | 0      | 0      | 11.06 | 88.94 | 0     | 0     | 0.145 |
| 90.  | Km 819.6                  | D2-18-063 | 0     |        | 170.2  | 0      | 11.06 | 88.94 | 0     | 0     | 0.145 |
| 91.  | km 819                    | D3-17-001 | 0     | 118.4  | 0      | 0      | 0     | 100   | 0     | 0     | 0.13  |
| 92.  | Km 811                    | D2-19-130 | 0     | 0      | 0      | 6      | 22.38 | 77.62 | 0     | 0     | 0.119 |
| 93.  | Km 808.5                  | D1-20-115 | 14.8  | 503.2  | 0      | 451.4  | 0     | 99.71 | 0.29  | 0     | 0.02  |
| 94.  | Km 808                    | D2-19-114 | 176.4 | 1990.8 | 0      | 252    | 2     | 97.85 | 0.15  | 0     | 0.07  |
| 95.  | Km 809                    | D2-20-114 | 100   | 375    | 175    | 0      | 2     | 97.85 | 0.15  | 0     | 0.07  |
| 96.  | Km 810                    | D1-20-114 | 50    | 0      | 0      | 0      | 2     | 97.85 | 0.15  | 0     | 0.07  |
| 97.  | Km 807.5                  | D2-20-111 | 0     | 200    | 0      | 0      | 4.7   | 95.22 | 0.08  | 0     | 0.05  |
| 98.  | Km 807                    | D1-20-108 | 25    | 450    | 50     | 0      | 80    | 19.98 | 0.02  | 0     | 0.08  |
| 99.  | Km 806                    | D2-19-100 | 0     | 25.2   | 0      | 0      | 0     | 38.56 | 47.29 | 14.16 | 0.15  |
| 100. | Km 807                    | D2-19-102 | 252   | 957.6  | 0      | 100.8  | 0     | 38.56 | 47.29 | 14.16 | 0.15  |
| 101. | Km 808                    | D2-20-102 | 0     | 25     | 0      | 225    | 0     | 38.56 | 47.29 | 14.16 | 0.15  |
| 102. | Km 809                    | D1-20-102 | 150   | 425    | 0      | 750    | 0     | 38.56 | 47.29 | 14.16 | 0.15  |
| 103. | Km 805                    | D2-19-094 | 25.2  | 151.2  | 0      | 0      | 40    | 59.94 | 0.06  | 0     | 0.02  |
| 104. | Km 806                    | D2-20-094 | 100   | 0      | 0      | 0      | 40    | 59.94 | 0.06  | 0     | 0.02  |
| 105. | Km 807                    | D1-20-096 | 59.2  | 1206.2 | 0      | 1598.4 | 40    | 59.94 | 0.06  | 0     | 0.02  |
| 106. | Km 794 Downstream Calafat | D15-132   | 14.8  | 614.2  | 0      | 0      | 0     | 94.03 | 4.78  | 1.19  | 0.1   |
| 107. | Km 794 Downstream Calafat | D14-131   | 481   | 14.8   | 236.8  | 0      | 0     | 94.03 | 4.78  | 1.19  | 0.1   |
| 108. | Km 794 Downstream Calafat | D13-055   | 7.4   | 0      | 66.6   | 0      | 0     | 94.03 | 4.78  | 1.19  | 0.1   |
| 109. | Km 794 Downstream Calafat | D12-132   | 0     | 0      | 3962.7 | 0      | 0     | 94.03 | 4.78  | 1.19  | 0.1   |
| 110. | Km 794 Downstream Calafat | D10-113   | 7.4   | 0      | 0      | 0      | 0     | 94.03 | 4.78  | 1.19  | 0.1   |

|      |                             |               |       |         |       |        |       |       |       |       |       |
|------|-----------------------------|---------------|-------|---------|-------|--------|-------|-------|-------|-------|-------|
| 111. | Km 765                      | D2-19-091     | 151.2 | 529.2   | 0     | 0      | 0     | 81.99 | 14.78 | 3.23  | 0.04  |
| 112. | Km 766                      | D2-19-093Bis  | 0     | 932.4   | 0     | 0      | 0     | 81.99 | 14.78 | 3.23  | 0.04  |
| 113. | Km 764.5                    | D2-19-089 Bis | 0     | 11289.6 | 0     | 0      | 57.52 | 42.32 | 0.16  | 0     | 0.017 |
| 114. | Km 764.6                    | D2-19-088 Bis | 0     | 3049.2  | 0     | 0      | 57.52 | 42.32 | 0.16  | 0     | 0.017 |
| 115. | Km 764                      | D2-19-087 Bis | 201.6 | 5418    | 0     | 0      | 57.52 | 42.48 | 0     | 0     | 0.016 |
| 116. | Km 763.5                    | D2-20-082 bis | 0     | 200     | 0     | 0      | 53.76 | 46.09 | 0.15  | 0     | 0.016 |
| 117. | Km 763.6                    | D1-20-082 bis | 0     | 775     | 0     | 0      | 53.76 | 46.09 | 0.15  | 0     | 0.016 |
| 118. | Km 762.5                    | D19-078       | 0     | 7.4     | 0     | 0      | 68.81 | 31.04 | 0.15  | 0     | 0.33  |
| 119. | Km 762.6                    | D1-20-076 bis | 225   | 0       | 25    | 0      | 68.81 | 31.04 | 0.15  | 0     | 0.33  |
| 120. | Km 762                      | D19-073       | 44.4  | 0       | 14.8  | 0      | 2.92  | 97.08 | 0     | 0     | 0.038 |
| 121. | Km 763                      | D1-20-073     | 0     | 125.8   | 0     | 133.2  | 2.92  | 97.08 | 0     | 0     | 0.038 |
| 122. | Km 764                      | D2-19-075     | 0     | 0       | 0     | 201.6  | 2.92  | 97.08 | 0     | 0     | 0.038 |
| 123. | Km 761                      | D2-19-069     | 0     | 3       | 0     | 0      | 1.8   | 98.2  | 0     | 0     | 0.21  |
| 124. | Km 760                      | D2-19-063     | 50.4  | 176.4   | 0     | 0      | 26.97 | 72.94 | 0.10  | 0     | 0.068 |
| 125. | Km 761                      | D2-20-063 bis | 25    | 1400    | 0     | 0      | 26.97 | 72.94 | 0.10  | 0     | 0.068 |
| 126. | Km 762                      | D1-20-063 bis | 3675  | 0       | 0     | 425    | 26.97 | 72.94 | 0.10  | 0     | 0.068 |
| 127. | Km 709 Upstream Jiu River   | D14-128       | 0     | 185     | 111   | 162.8  | 0     | 96.07 | 3.22  | 0.71  | 0.061 |
| 128. | Km 709 Upstream Jiu River   | D11-130       | 0     | 59.2    | 281.2 | 0      | 0     | 96.07 | 3.22  | 0.71  | 0.061 |
| 129. | Km 709 Upstream Jiu River   | D10-112       | 0     | 0       | 0     | 1562.5 | 0     | 96.07 | 3.22  | 0.71  | 0.061 |
| 130. | Km 692 Downstream Jiu River | D2-16-029     | 14.8  | 81.4    | 0     | 0      | 5.46  | 94.54 | 0     | 0     | 0.103 |
| 131. | km 691.5 Jiu River          | D2-16-022     | 0     | 14.8    | 0     | 0      | 0     | 99.1  | 0.74  | 0.16  | 1.141 |
| 132. | km 691.5 Jiu River          | D11-127       | 14.8  | 0       | 0     | 0      | 0     | 99.1  | 0.74  | 0.16  | 1.141 |
| 133. | km 681 Upstream Bechet      | D14-122       | 0     | 140.6   | 0     | 0      | 0     | 3.46  | 74.47 | 22.07 | 0.262 |
| 134. | km 681 Upstream Bechet      | D11-123       | 0     | 7.4     | 7.4   | 0      | 0     | 3.46  | 74.47 | 22.07 | 0.262 |
| 135. | Km 687 Kozlodui             | D2-16-019     | 7.4   | 59.2    | 0     | 0      | 0     | 96.07 | 3.22  | 0.71  | 0.311 |
| 136. | Km 687 Kozlodui             | D14-124       | 0     | 673.4   | 0     | 0      | 0     | 96.07 | 3.22  | 0.71  | 0.311 |
| 137. | Km 687 Kozlodui             | D11-125       | 7.4   | 0       | 0     | 0      | 0     | 96.07 | 3.22  | 0.71  | 0.311 |
| 138. | Km 687 Kozlodui             | D10-110       | 312.5 | 0       | 0     | 0      | 0     | 96.07 | 3.22  | 0.71  | 0.311 |
| 139. | Km 678 Downstream Bechet    | D2-16-017     | 0     | 103.6   | 0     | 0      | 24.59 | 75.41 | 0     | 0     | 0.16  |

|      |                          |            |       |       |       |      |       |        |       |      |       |
|------|--------------------------|------------|-------|-------|-------|------|-------|--------|-------|------|-------|
| 140. | Km 678 Downstream Bechet | D1-20-060  | 0     | 192.4 | 0     | 0    | 24.59 | 75.41  | 0     | 0    | 0.16  |
| 141. | Km 678 Downstream Bechet | D2-19-058  | 0     | 5     | 0     | 0    | 24.59 | 75.41  | 0     | 0    | 0.16  |
| 142. | Km 676.5                 | D2-18-049  | 0     | 0     | 133.2 | 0    | 0     | 99.92  | 0.08  | 0    | 0.07  |
| 143. | Km 676.6                 | D1-20-049  | 0     | 37    | 0     | 0    | 0     | 99.92  | 0.08  | 0    | 0.07  |
| 144. | Km 676                   | D2-20-046  | 50    | 0     | 0     | 0    | 9.3   | 90.7   | 0     | 0    | 0.016 |
| 145. | Km 677                   | D19-046    | 0     | 399.6 | 0     | 59.2 | 9.3   | 90.7   | 0     | 0    | 0.016 |
| 146. | Km 675.5                 | D1-18-043  | 0     | 0     | 14.8  | 0    | 0.24  | 99.72  | 0.04  | 0    | 0.239 |
| 147. | Km 675.6                 | D2-19-045  | 0     | 2     | 0     | 2    | 0.24  | 99.72  | 0.04  | 0    | 0.239 |
| 148. | Km 675                   | D2-19-40   | 0     | 6     | 0     | 1    | 3.48  | 96.52  | 0     | 0    | 0.06  |
| 149. | Km 674.5                 | D19-039    | 0     | 236.8 | 0     | 0    | 15.12 | 84.88  | 0     | 0    | 0.115 |
| 150. | Km 674                   | D2-19-034  | 25.2  | 907.2 |       | 0    | 0.36  | 99.64  | 0     | 0    | 0.119 |
| 151. | Km 635 Upstream Corabia  | D13-041    | 14.8  | 0     | 0     | 0    | 0.587 | 94.849 | 4.565 | 0    | 0.237 |
| 152. | Km 635 Upstream Corabia  | D10-108    | 937.5 | 0     | 0     | 0    | 0.587 | 94.849 | 4.565 | 0    | 0.237 |
| 153. | Km 630                   | D1-20-027  | 0     | 25    | 0     | 50   | 60    | 39.93  | 0.07  | 0    | 2.804 |
| 154. | Km 629                   | D19-020    | 0     | 355.2 | 0     | 0    | 29.24 | 57.6   | 13.16 | 0    | 0.138 |
| 155. | Km 630                   | D1-18-021  | 0     | 0     | 29.6  | 0    | 29.24 | 57.6   | 13.16 | 0    | 0.138 |
| 156. | Km 628                   | D1-20-014  | 0     | 666   | 0     | 0    | 10    | 89.96  | 0.04  | 0    | 0.1   |
| 157. | Km 629                   | D2-20-015  | 100   | 0     | 0     | 0    | 10    | 89.96  | 0.04  | 0    | 0.1   |
| 158. | Km 627.5                 | D1-20-011  | 150   | 0     | 0     | 0    | 17.50 | 12.89  | 69.61 | 0    | 0.12  |
| 159. | Km 627                   | D1-20- 009 | 0     | 75    | 0     | 0    | 25.54 | 74.42  | 0.04  | 0    | 0.07  |
| 160. | Km 628                   | D19-008    | 0     | 29.6  | 0     | 0    | 25.54 | 74.42  | 0.04  | 0    | 0.07  |
| 161. | Km 629                   | D2-20-008  | 200   | 0     | 0     | 0    | 25.54 | 74.42  | 0.04  | 0    | 0.07  |
| 162. | Km 630                   | D1-18-007  | 29.6  | 0     | 0     | 44.4 | 25.54 | 74.42  | 0.04  | 0    | 0.07  |
| 163. | Km 626.5                 | D2-19-004  | 756   | 126   | 0     | 0    | 17.32 | 64.53  | 14.63 | 3.51 | 0.45  |
| 164. | Km 626                   | D2-18-003  | 0     | 0     | 518   | 0    | 0     | 100    | 0     | 0    | 0.735 |
| 165. | Km 627                   | D2-19-001  | 0     | 177.6 | 0     | 0    | 0     | 100    | 0     | 0    | 0.735 |
| 166. | Km 628                   | D2-19-002  | 0     | 0     | 0     | 9    | 0     | 100    | 0     | 0    | 0.735 |
| 167. | Km 629                   | D2-20-003  | 0     | 1     | 0     | 0    | 0     | 100    | 0     | 0    | 0.735 |
| 168. | Km 630                   | D1-18-002  | 0     | 0     | 0     | 44.4 | 0     | 100    | 0     | 0    | 0.735 |

|      |                                  |           |         |        |           |       |       |        |        |       |       |
|------|----------------------------------|-----------|---------|--------|-----------|-------|-------|--------|--------|-------|-------|
| 169. | Km 631                           | D1-18-001 | 0       | 0      | 0         | 74    | 0     | 100    | 0      | 0     | 0.735 |
| 170. | Km 632                           | D2-16-004 | 0       | 14.8   | 0         | 0     | 0     | 100    | 0      | 0     | 0.735 |
| 171. | km 604.4 Olt River               | D2-16-005 | 0       | 44.4   | 0         | 0     | 0     | 95.09  | 4.24   | 0.67  | 0.623 |
| 172. | km 604.4 Olt River               | D2-16-008 | 0       | 66.6   | 0         | 0     | 0     | 95.09  | 4.24   | 0.67  | 0.623 |
| 173. | km 604.4 Olt River               | D2-16-013 | 0       | 7.4    | 0         | 0     | 0     | 95.09  | 4.24   | 0.67  | 0.623 |
| 174. | km 604.4 Olt River               | D13-037   | 29.6    | 0      | 0         | 0     | 0     | 95.09  | 4.24   | 0.67  | 0.623 |
| 175. | km 604.4 Olt River               | D11-114   | 7.4     | 0      | 0         | 0     | 0     | 95.09  | 4.24   | 0.67  | 0.623 |
| 176. | km 595 Downstream Turnu Magurele | D2-16-002 | 14.8    | 7.4    | 0         | 0     | 0     | 98.99  | 0.81   | 0.2   | 0.114 |
| 177. | km 595 Downstream Turnu Magurele | D11-110   | 59.2    | 0      | 3211.6    | 0     | 0     | 98.99  | 0.81   | 0.2   | 0.114 |
| 178. | Km 551 Downstream Zimnicea       | D15-105   | 14.8    | 118.4  | 0         | 0     | 6.98  | 93.02  | 0      | 0     | 0.01  |
| 179. | Km 551 Downstream Zimnicea       | D14-105   | 140.6   | 1043.4 | 7.4       | 59.2  | 6.98  | 93.02  | 0      | 0     | 0.01  |
| 180. | Km 551 Downstream Zimnicea       | D13-028   | 14.8    | 0      | 14.8      | 0     | 6.98  | 93.02  | 0      | 0     | 0.01  |
| 181. | Km 551 Downstream Zimnicea       | D11-107   | 0       | 0      | 14.8      | 0     | 6.98  | 93.02  | 0      | 0     | 0.01  |
| 182. | Km 551 Downstream Zimnicea       | D10-103   | 156.25  | 0      | 0         | 312.5 | 6.98  | 93.02  | 0      | 0     | 0.01  |
| 183. | Km. 557 Upstream Zimnicea        | D15-109   | 0       | 192.4  | 0         | 0     | 0     | 94.85  | 4.57   | 0.59  | 0.39  |
| 184. | Km. 557 Upstream Zimnicea        | D14-109   | 0       | 0      | 0         | 96.2  | 0     | 94.85  | 4.57   | 0.59  | 0.39  |
| 185. | Km. 557 Upstream Zimnicea        | D 12-109  | 52.836  | 0      | 16749.012 | 0     | 0     | 94.85  | 4.57   | 0.59  | 0.39  |
| 186. | Km 500 Upstream Ruse Giurgiu     | D10-101   | 312.5   | 468.75 | 0         | 0     | 0     | 69.839 | 23.933 | 6.228 | 0.168 |
| 187. | Km. 481 Downstream Giurgiu       | D13-022   | 7.4     | 0      | 81.4      | 0     | 15.17 | 84.83  | 0      | 0     | 0.175 |
| 188. | Km 428 Dowsntream Oltenita       | D15-094   | 148     | 399.6  | 0         | 14.8  | 0     | 72.45  | 21.973 | 5.577 | 0.483 |
| 189. | Km 428 Dowsntream Oltenita       | D13-018   | 140.6   | 0      | 421.8     | 0     | 0     | 72.45  | 21.973 | 5.577 | 0.483 |
| 190. | Km 428 Dowsntream Oltenita       | D10-094   | 2343.75 | 0      | 0         | 0     | 0     | 72.45  | 21.973 | 5.577 | 0.483 |
| 191. | Km. 375 Chiciu-Silistra          | D15-091   | 0       | 259    | 37        | 0     | 0     | 23.94  | 61.03  | 15.02 | 0.13  |
| 192. | Km. 375 Chiciu-Silistra          | D14-091   | 22.2    | 22.2   | 0         | 0     | 0     | 23.94  | 61.03  | 15.02 | 0.13  |
| 193. | Km. 348 Ivoarele                 | D15-84    | 81.4    | 466.2  | 44.4      | 0     | 2.07  | 90.38  | 6.79   | 0.76  | 0.075 |
| 194. | Km. 348 Ivoarele                 | D14-087   | 621.6   | 0      | 185       | 0     | 2.07  | 90.38  | 6.79   | 0.76  | 0.075 |
| 195. | Km. 348 Ivoarele                 | D13-011   | 0       | 0      | 14.8      | 0     | 2.07  | 90.38  | 6.79   | 0.76  | 0.075 |
| 196. | km 294 Seimeni                   | D15-074   | 451.4   | 0      | 185       | 0     | 0     | 8.31   | 72.19  | 19.5  | 0.13  |
| 197. | km 294 Seimeni                   | D15-074   | 7.4     | 444    | 177.6     | 7.4   | 0     | 8.31   | 72.19  | 19.5  | 0.13  |

|      |                                  |           |        |       |          |        |      |        |        |        |      |
|------|----------------------------------|-----------|--------|-------|----------|--------|------|--------|--------|--------|------|
| 198. | km 294 Seimeni                   | D14-074   | 0      | 310.8 | 0        | 133.2  | 0    | 8.31   | 72.19  | 19.5   | 0.13 |
| 199. | km 294 Seimeni                   | D14-074   | 22.2   | 7.4   | 22.2     | 0      | 0    | 8.31   | 72.19  | 19.5   | 0.13 |
| 200. | km 294 Seimeni                   | D14-074   | 3714.8 | 0     | 0        | 0      | 0    | 8.31   | 72.19  | 19.5   | 0.13 |
| 201. | km 294 Seimeni                   | D11-074   | 7.4    | 0     | 7.4      | 0      | 0    | 8.31   | 72.19  | 19.5   | 0.13 |
| 202. | km 239 Upstream Giurgieni Bridge | D11-066   | 7.4    | 0     | 0        | 0      | 0    | 93.184 | 6.168  | 0.648  | 0.73 |
| 203. | km 239 Upstream Giurgieni Bridge | D10-061   | 156.25 | 0     | 0        | 0      | 0    | 93.184 | 6.168  | 0.648  | 0.73 |
| 204. | Channel Danube - Black Sea       | D13-001   | 0      | 0     | 155.4    | 0      | 0    | 7.01   | 72.61  | 20.38  | 1.09 |
| 205. | Mm 54 Isaccea                    | D14-041   | 37     | 0     | 192.4    | 1013.8 | 0    | 1.94   | 68.53  | 29.53  | 0.23 |
| 206. | km 253 Upstream Harsova          | D15-071   | 177.6  | 148   | 0        | 0      | 0    | 72.24  | 23.02  | 4.75   | 0.15 |
| 207. | km 253 Upstream Harsova          | D14-071   | 0      | 96.2  | 7.4      | 148    | 0    | 72.24  | 23.02  | 4.75   | 0.15 |
| 208. | km 253 Upstream Harsova          | D11-071   | 14.8   | 0     | 14.8     | 0      | 0    | 72.24  | 23.02  | 4.75   | 0.15 |
| 209. | km 253 Upstream Harsova          | D10-071   | 1250   | 0     | 0        | 0      | 0    | 72.24  | 23.02  | 4.75   | 0.15 |
| 210. | km 247 Downstream Harsova        | D14-068   | 0      | 22.2  | 0        | 0      | 0    | 93.794 | 5.6    | 0.605  | 0.63 |
| 211. | km 247 Downstream Harsova        | D14-069   | 14.8   | 0     | 51.8     | 0      | 0    | 93.794 | 5.6    | 0.605  | 0.63 |
| 212. | km 247 Downstream Harsova        | D12-068   | 0      | 0     | 2641.8   | 0      | 0    | 93.794 | 5.6    | 0.605  | 0.63 |
| 213. | km 247 Downstream Harsova        | D11-068   | 0      | 0     | 22.2     | 0      | 0    | 93.794 | 5.6    | 0.605  | 0.63 |
| 214. | km 247 Downstream Harsova        | D10-068   | 312.5  | 0     | 0        | 0      | 0    | 93.794 | 5.6    | 0.605  | 0.63 |
| 215. | Km. 159 Upstream Siret           | D14-049   | 0      | 14.8  | 0        | 0      | 0    | 38.56  | 47.29  | 14.16  | 0.56 |
| 216. | Km. 155 Siret River              | D14-048   | 88.8   | 0     | 0        | 0      | 0    | 1.59   | 74.42  | 23.99  | 0.47 |
| 217. | Km. 2 (246) Borcea Arm           | D14-062   | 0      | 0     | 0        | 125.8  | 0    | 97.73  | 1.86   | 0.41   | 0.52 |
| 218. | Km. 94+400 Călărași-Borcea Arm   | D14-090   | 2220   | 155.4 | 7.4      | 81.4   | 0.86 | 99.14  | 0      | 0      | 0.45 |
| 219. | Km. 94+400 Călărași-Borcea Arm   | D13-014   | 44.4   | 0     | 14.8     | 0      | 0.86 | 99.14  | 0      | 0      | 0.45 |
| 220. | km 174 Upstream Braila           | D14-059   | 7.4    | 162.8 | 0        | 399.6  | 0    | 91.43  | 7.33   | 1.24   | 0.56 |
| 221. | km 174 Upstream Braila           | D 12-058  | 0      | 0     | 7344.204 | 0      | 0    | 91.43  | 7.33   | 1.24   | 0.56 |
| 222. | km 174 Upstream Braila           | D11-058   | 22.2   | 0     | 207.2    | 0      | 0    | 91.43  | 7.33   | 1.24   | 0.56 |
| 223. | km 174 Upstream Braila           | D10-058   | 0      | 0     | 0        | 781.25 | 0    | 91.43  | 7.33   | 1.24   | 0.56 |
| 224. | km 167 Downstream Braila         | D 12-052  | 0      | 0     | 369.852  | 0      | 0    | 81.99  | 14.78  | 3.23   | 0.06 |
| 225. | km 167 Downstream Braila         | D11-052   | 0      | 0     | 214.6    | 0      | 0    | 81.99  | 14.78  | 3.23   | 0.06 |
| 226. | Km 100+ 200m – Ostrov Arm        | D1-17-028 | 0      | 0     | 29.6     | 0      | 0    | 21.991 | 64.232 | 13.777 | 0.19 |



|      |                          |            |       |        |         |        |       |        |        |        |       |
|------|--------------------------|------------|-------|--------|---------|--------|-------|--------|--------|--------|-------|
| 227. | km 4 Macin Arm           | D14-056    | 0     | 14.8   | 0       | 133.2  | 0     | 54.96  | 37.25  | 7.79   | 0.13  |
| 228. | km 4 Macin Arm           | D12-056    | 0     | 0      | 898.212 | 0      | 0     | 54.96  | 37.25  | 7.79   | 0.13  |
| 229. | km 4 Macin Arm           | D11-056    | 0     | 0      | 458.8   | 0      | 0     | 54.96  | 37.25  | 7.79   | 0.13  |
| 230. | km 4 Macin Arm           | D10-055    | 0     | 0      | 0       | 156.25 | 0     | 54.96  | 37.25  | 7.79   | 0.13  |
| 231. | Ceatal Izmail – Mm 43,5  | DD20-100   | 222   | 592    | 0       | 0      | 0     | 0.22   | 45.16  | 54.62  | 0.29  |
| 232. | Ceatal Izmail – Mm 43,6  | DD19-118   | 0     | 680.8  | 0       | 0      | 0     | 0.22   | 45.16  | 54.62  | 0.29  |
| 233. | Ceatal Izmail – Mm 43,7  | DD18-078   | 0     | 843.6  | 0       | 0      | 0     | 0.22   | 45.16  | 54.62  | 0.29  |
| 234. | Ceatal Izmail – Mm 43,8  | DD20-017   | 177.6 | 0      | 236.8   | 0      | 0     | 0.22   | 45.16  | 54.62  | 0.29  |
| 235. | Ceatal Izmail – Mm 43,9  | D15-015    | 103.6 | 0      | 0       | 0      | 0     | 0.22   | 45.16  | 54.62  | 0.29  |
| 236. | Ceatal Izmail – Mm 43,10 | D15-015    | 51.8  | 51.8   | 0       | 0      | 0     | 0.22   | 45.16  | 54.62  | 0.29  |
| 237. | Ceatal Izmail – Mm 43,11 | D11-015    | 0     | 7.4    | 0       | 7.4    | 0     | 0.22   | 45.16  | 54.62  | 0.29  |
| 238. | Arm Tulcea – Mm 42,5     | D15-017    | 0     | 103.6  | 0       | 0      | 0     | 11.89  | 72.36  | 15.75  | 0.19  |
| 239. | Arm Tulcea – Mm 42,6     | D14-017    | 0     | 0      | 0       | 7.4    | 0     | 11.89  | 72.36  | 15.75  | 0.19  |
| 240. | Arm Tulcea – Mm 42,7     | DD19-124   | 7.4   | 0      | 0       | 7.4    | 0     | 11.89  | 72.36  | 15.75  | 0.19  |
| 241. | Arm Tulcea – Mm 42,8     | DD18-083   | 0     | 962    | 0       | 0      | 0     | 34.476 | 52.188 | 13.337 | 0.484 |
| 242. | Arm Tulcea – Mm 42,9     | DD20-020   | 636.4 | 29.6   | 0       | 0      | 0     | 7.843  | 72.208 | 19.95  | 0.827 |
| 243. | Arm Tulcea – Mm 42,10    | DD20-106   | 14.8  | 0      | 0       | 0      | 0     | 34.476 | 52.188 | 13.337 | 0.484 |
| 244. | Arm Tulcea - Mm 37,5     | DD18-128   | 111   | 0      | 0       | 347.8  | 0     | 8.48   | 72.65  | 18.87  | 0.47  |
| 245. | Arm Tulcea - Mm 37,6     | DD19-129   | 29.6  | 9427.6 | 0       | 14.8   | 0     | 8.48   | 72.65  | 18.87  | 0.47  |
| 246. | Arm Tulcea - Mm 37,7     | DD20-25    | 22.2  | 0      | 0       | 0      | 0     | 8.48   | 72.65  | 18.87  | 0.47  |
| 247. | Arm Tulcea - Mm 37,8     | DD19-025   | 59.2  | 0      | 0       | 0      | 0     | 8.48   | 72.65  | 18.87  | 0.47  |
| 248. | Arm Tulcea - Mm 37,9     | DD20-111   | 185   | 0      | 0       | 0      | 0     | 8.48   | 72.65  | 18.87  | 0.47  |
| 249. | Arm Tulcea - Mm 35       | DD19-026   | 0     | 37     | 14.8    | 7.4    | 34.52 | 50.88  | 11.39  | 3.21   | 0.196 |
| 250. | Arm Tulcea - Mm 36       | DD20-026   | 7.4   | 22.2   | 7.4     | 0      | 34.52 | 50.88  | 11.39  | 3.21   | 0.196 |
| 251. | Arm Tulcea - Mm 37       | DD20-114   | 118.4 | 0      | 0       | 0      | 34.52 | 50.88  | 11.39  | 3.21   | 0.196 |
| 252. | Arm Tulcea               | PO1TU09-44 | 0     | 37     | 0       | 37     | 0     | 59.974 | 33.46  | 6.56   | 0.032 |
| 253. | Km. 115.5 Arm Chilia     | D15-011    | 0     | 7.4    | 0       | 0      | 0     | 91.42  | 7.07   | 1.51   | 0.152 |
| 254. | Km. 115.5 Arm Chilia     | D14-012    | 22.2  | 0      | 0       | 0      | 0     | 91.42  | 7.07   | 1.51   | 0.152 |

|      |                                 |             |         |        |        |        |       |        |        |        |       |
|------|---------------------------------|-------------|---------|--------|--------|--------|-------|--------|--------|--------|-------|
| 255. | Arm Chilia – km 114             | DD19-121    | 0       | 495.8  | 0      | 0      | 0.48  | 99.34  | 0.14   | 0.04   | 0.183 |
| 256. | Arm Chilia – km 80 - Pardina    | DD20-010    | 0       | 7.4    | 0      | 0      | 2.03  | 76.73  | 16.88  | 4.35   | 0.16  |
| 257. | Arm Chilia – km 80 - Pardina    | DD19-008    | 59.2    | 37     | 51.8   | 303.4  | 2.03  | 76.73  | 16.88  | 4.35   | 0.16  |
| 258. | Pardina                         | DD18-090    | 74      | 148    | 0      | 88.8   | 0     | 0.36   | 47.88  | 51.76  | 0.036 |
| 259. | Km. 40 Downstream Chilia        | D15-008     | 59.2    | 0      | 0      | 0      | 0     | 5.29   | 68.97  | 25.74  | 0.42  |
| 260. | Km. 40 Downstream Chilia        | D15-009     | 0       | 902.8  | 0      | 0      | 0     | 5.29   | 68.97  | 25.74  | 0.42  |
| 261. | Km. 40 Downstream Chilia        | D15-008     | 59.2    | 0      | 0      | 0      | 0     | 5.29   | 68.97  | 25.74  | 0.42  |
| 262. | Km. 40 Downstream Chilia        | D14-009     | 466.2   | 0      | 0      | 1065.6 | 0     | 5.29   | 68.97  | 25.74  | 0.42  |
| 263. | Km. 40 Downstream Chilia        | D14-014     | 0       | 103.6  | 0      | 22.2   | 0     | 5.29   | 68.97  | 25.74  | 0.42  |
| 264. | Km 20 Vâlcov                    | D14-005     | 7.4     | 22.2   | 7.4    | 0      | 0     | 1.71   | 73.96  | 24.33  | 0.24  |
| 265. | Km 20 Vâlcov                    | D12-005     | 317.016 | 0      | 52.836 | 0      | 0     | 1.71   | 73.96  | 24.33  | 0.24  |
| 266. | Km. 3 Old Stambul               | D15-003     | 7.4     | 0      | 0      | 0      | 0     | 9.713  | 68.723 | 21.564 | 0.65  |
| 267. | Old Chilia                      | DD18-093    | 0       | 74     | 0      | 577.2  | 0     | 99.84  | 0.16   | 0      | 0.036 |
| 268. | Arm Chilia – km 45 - Old Chilia | DD19-004    | 1       | 0      | 152    | 70     | 0     | 8.55   | 68.42  | 23.04  | 0.33  |
| 269. | Arm Chilia – km 45 - Old Chilia | DD20-004    | 1517    | 0      | 0      | 0      | 0     | 8.55   | 68.42  | 23.04  | 0.33  |
| 270. | Arm Chilia – km 23 - Periprava  | DD19-001    | 0       | 66.6   | 0      | 0      | 0     | 98.15  | 1.55   | 0.3    | 0.302 |
| 271. | Arm Chilia – km 23 - Periprava  | DD20-003    | 0       | 37     | 0      | 0      | 0     | 98.15  | 1.55   | 0.3    | 0.302 |
| 272. | Arm Chilia – km 23 - Periprava  | DD18 -97    | 0       | 7.4    | 0      | 2      | 0     | 98.15  | 1.55   | 0.3    | 0.303 |
| 273. | Arm Chilia – km 23 - Periprava  | DD19-003    | 0       | 769.6  | 14.8   | 0      | 0     | 26.195 | 54.974 | 18.832 | 0.712 |
| 274. | Arm Sulina                      | P05SU05-026 | 0       | 0      | 0      | 414.4  | 56.88 | 22.92  | 17.58  | 2.62   | 0.55  |
| 275. | Arm Sulina                      | P12-09-03   | 0       | 532.8  | 0      | 0      | 2.72  | 96.78  | 0.5    | 0      | 0.072 |
| 276. | Arm Sulina                      | PO3SU09-34  | 59.2    | 2064.6 | 614.2  | 784.4  | 1.34  | 98.66  | 0      | 0      | 0.016 |
| 277. | Arm Sulina                      | PO2SU09-37  | 111     | 362.6  | 0      | 310.8  | 6.44  | 45.1   | 38.2   | 10.26  | 0.03  |
| 278. | Arm Sulina                      | PO2SU09-36  | 244.2   | 629    | 0      | 266.4  | 6.44  | 45.1   | 38.2   | 10.26  | 0.03  |
| 279. | Arm Sulina                      | P10-SU05-08 | 7.4     | 7.4    | 29.6   | 29.6   | 27.16 | 61.48  | 8.18   | 3.18   | 0.58  |
| 280. | Arm Sulina                      | D2PO2       | 7.4     | 133.2  | 0      | 0      | 0     | 100    | 0      | 0      | 0.017 |
| 281. | Arm Sulina                      | D2FO2       | 14.8    | 51.8   | 0      | 0      | 0     | 99.78  | 0.17   | 0.05   | 0.02  |
| 282. | Arm Sulina                      | D1TO2       | 0       | 14.8   | 0      | 0      | 0     | 99.9   | 0.08   | 0.02   | 0.554 |
| 283. | Arm Sulina                      | D1FO2       | 14.8    | 44.4   | 0      | 0      | 5.12  | 94.68  | 0.16   | 0.04   | 0.013 |

|      |                                             |             |       |        |        |        |       |        |        |        |       |
|------|---------------------------------------------|-------------|-------|--------|--------|--------|-------|--------|--------|--------|-------|
| 284. | Arm Sulina (Meander)                        | P07SU05-017 | 22.2  | 0      | 0      | 370    | 27.7  | 15.88  | 44.14  | 12.28  | 0.26  |
| 285. | Arm Sulina (Meander)                        | P10SU09-09  | 0     | 14.8   | 0      | 14.8   | 0     | 6.25   | 67.49  | 26.26  | 0.877 |
| 286. | Arm Sulina - Crişan                         | P08SU05-015 | 0     | 0      | 0      | 118.4  | 0     | 3.27   | 72.11  | 24.62  | 0.76  |
| 287. | Arm Sulina - Crişan                         | DD18-143    | 59.2  | 59.2   | 851    | 451.4  | 0     | 3.27   | 72.111 | 24.619 | 0.229 |
| 288. | Arm Sulina - Crişan                         | DD18-150    | 0     | 599.4  | 0      | 44.4   | 0     | 5.02   | 74.12  | 20.86  | 0.5   |
| 289. | Arm Sulina - Crişan                         | P03SU05-033 | 7.4   | 0      | 710.4  | 2020.2 | 1.34  | 98.66  | 0      | 0      | 0.03  |
| 290. | Arm Sulina - Mm 0                           | DD20-036    | 0     | 14.8   | 0      | 0      | 0     | 13.895 | 68.584 | 17.522 | 0.057 |
| 291. | Arm Sulina - Mm 14                          | DD20-043    | 0     | 0      | 1265.4 | 0      | 0     | 14.048 | 71.469 | 14.483 | 0.607 |
| 292. | Hm 72 Channel Sulina                        | D15-029     | 29.6  | 0      | 0      | 0      | 0     | 12.376 | 68.102 | 19.522 | 0.839 |
| 293. | Channel Sulina                              | P04SU05-031 | 0     | 0      | 0      | 1894.4 | 0     | 21.031 | 58.57  | 20.40  | 0.839 |
| 294. | Mila 2.8 Sulina                             | D15-032     | 0     | 111    | 74     | 0      | 0     | 14.14  | 66.99  | 18.87  | 0.56  |
| 295. | Mila 2.8 Sulina                             | D14-034     | 0     | 7.4    | 0      | 0      | 0     | 14.14  | 66.99  | 18.87  | 0.56  |
| 296. | Mila 2.8 Sulina                             | D14-033     | 0     | 0      | 96.2   | 0      | 0     | 14.14  | 66.99  | 18.87  | 0.56  |
| 297. | Mila 2.8 Sulina                             | D10-032     | 18125 | 0      | 0      | 0      | 0     | 14.14  | 66.99  | 18.87  | 0.56  |
| 298. | Mila 33.5 Arm Sulina                        | D13-170     | 0     | 0      | 0      | 22.2   | 0     | 93.65  | 5.4    | 0.95   | 0.14  |
| 299. | Arm Sulina downstream/ Meteo station Sulina | DD18-156    | 0     | 1265.4 | 0      | 0      | 0     | 0.96   | 55.124 | 43.916 | 0.626 |
| 300. | Old Danube (Arm Sulina - Crişan)            | DD18-140    | 0     | 266.4  | 0      | 14.8   | 0     | 0.51   | 48.5   | 50.98  | 0.23  |
| 301. | Channel Caraorman                           | DD18-148    | 0     | 25.2   | 0      | 0      | 5.712 | 89.058 | 4.33   | 0.9    | 0.574 |
| 302. | Channel Caraorman                           | DD18-144    | 0     | 0      | 0      | 25.2   | 0     | 5.556  | 70.416 | 24.028 | 0.876 |
| 303. | Channel Caraorman                           | DD19-178    | 0     | 0      | 0      | 50.4   | 5.71  | 89.06  | 4.33   | 0.9    | 0.574 |
| 304. | Channel Caraorman                           | DD20-50     | 50    | 0      | 100    | 0      | 0     | 5.556  | 70.416 | 24.028 | 0.876 |
| 305. | Channel Caraorman                           | DD20-051    | 0     | 0      | 625    | 0      | 5.71  | 89.06  | 4.33   | 0.9    | 0.574 |
| 306. | Channel Caraorman – enter Puiu lake         | DD18-145    | 0     | 25.2   | 0      | 75.6   | 0     | 5.556  | 70.416 | 24.028 | 0.876 |
| 307. | Channel Busurca                             | DD18-153    | 0     | 0      | 0      | 14.8   | 3.74  | 96.09  | 0.17   | 0      | 2.782 |
| 308. | Channel Busurca                             | DD19-172    | 0     | 0      | 0      | 126    | 3.74  | 96.09  | 0.17   | 0      | 2.782 |
| 309. | Old Danube                                  | DD20-046    | 281.2 | 0      | 29.6   | 0      | 0     | 6.671  | 66.091 | 27.24  | 0.545 |
| 310. | Arm Sf. Gheorghe                            | P01SF05-041 | 0     | 0      | 199.8  | 325.6  | 0     | 33.424 | 57.517 | 9.059  | 0.25  |
| 311. | Ceatal Sf. Gheorghe Mila 34                 | D15-020     | 0     | 22.2   | 0      | 0      | 0     | 99.98  | 0.02   | 0      | 0.13  |

|      |                                       |            |        |       |       |       |   |        |        |        |       |
|------|---------------------------------------|------------|--------|-------|-------|-------|---|--------|--------|--------|-------|
| 312. | Ceatal Sf. Gheorghe Mila 35           | D10-020    | 468.75 | 0     | 0     | 0     | 0 | 99.98  | 0.02   | 0      | 0.13  |
| 313. | Ceatal Sf. Gheorghe Mila 36           | D14-020    | 7.4    | 14.8  | 0     | 0     | 0 | 99.98  | 0.02   | 0      | 0.13  |
| 314. | Ceatal Sf. Gheorghe - km 108          | DD18-137   | 0      | 22.2  | 0     | 273.8 | 0 | 24.23  | 59.09  | 16.68  | 0.74  |
| 315. | Ceatal Sf. Gheorghe - km 109          | D1-17-024  | 0      | 0     | 7.4   | 0     | 0 | 24.23  | 59.09  | 16.68  | 0.74  |
| 316. | Ceatal Sf. Gheorghe - km 110          | D15-027    | 14.8   | 7.4   | 0     | 0     | 0 | 24.23  | 59.09  | 16.68  | 0.74  |
| 317. | Ceatal Sf. Gheorghe - km 111          | D14-023    | 0      | 0     | 0     | 29.6  | 0 | 24.23  | 59.09  | 16.68  | 0.74  |
| 318. | Ceatal Sf. Gheorghe - km 112          | DD20-031   | 37     | 0     | 0     | 0     | 0 | 24.23  | 59.09  | 16.68  | 0.74  |
| 319. | Ceatal Sf. Gheorghe - km 113          | DD20-118   | 22.2   | 0     | 81.4  | 0     | 0 | 24.23  | 59.09  | 16.68  | 0.74  |
| 320. | Arm Sf. Gheorghe – Downstream Dunavăț | DD18-185   | 0      | 59.2  | 0     | 51.8  | 0 | 28.303 | 54.27  | 17.427 | 1.2   |
| 321. | Arm Sf. Gheorghe                      | DD18-133   | 0      | 29.6  | 0     | 0     | 0 | 99.64  | 0.36   | 0      | 0.05  |
| 322. | Arm Sf. Gheorghe                      | H16-024    | 112    | 0     | 0     | 224   | 0 | 96.96  | 2.53   | 0.51   | 0.272 |
| 323. | Arm Sf. Gheorghe                      | G1-16-003  | 560    | 10080 | 0     | 0     | 0 | 73.76  | 20.84  | 5.4    | 0.073 |
| 324. | Arm Sf. Gheorghe                      | A1-16-008  | 168    | 448   | 0     | 0     | 0 | 48.457 | 43.69  | 7.853  | 0.011 |
| 325. | Arm Sf. Gheorghe                      | G1-16-001  | 0      | 0     | 0     | 224   | 0 | 99.43  | 0.57   | 0      | 0.15  |
| 326. | Arm Sf. Gheorghe                      | PO1SF09-41 | 59.2   | 414.4 | 88.8  | 140.6 | 0 | 48.457 | 43.69  | 7.853  | 0.011 |
| 327. | Arm Sf. Gheorghe                      | PO6SU09-23 | 59.2   | 407   | 37    | 148   | 0 | 99.43  | 0.57   | 0      | 0.15  |
| 328. | Arm Sf. Gheorghe – Km 57+500          | DD19-159   | 0      | 74    | 0     | 0     | 0 | 99.88  | 0.09   | 0.03   | 0.3   |
| 329. | Arm Sf. Gheorghe - Km 54 + 500m       | DD19-047   | 7.4    | 14.8  | 0     | 0     | 0 | 13.38  | 66.14  | 20.48  | 1.98  |
| 330. | Arm Sf. Gheorghe - km 54              | DD20-125   | 229.4  | 0     | 13320 | 0     | 0 | 13.38  | 66.14  | 20.48  | 1.98  |
| 331. | Arm Sf. Gheorghe – Km 49 + 500m       | DD19-040   | 0      | 0     | 7.4   | 0     | 0 | 11.996 | 66.295 | 21.709 | 0.122 |
| 332. | Arm Sf. Gheorghe – Km 48              | DD19-035   | 0      | 0     | 0     | 14.8  | 0 | 49.23  | 42.25  | 8.522  | 0.385 |
| 333. | Arm Sf. Gheorghe – Km 49              | DD19-144   | 0      | 222   | 0     | 37    | 0 | 48.457 | 43.69  | 7.853  | 0.011 |
| 334. | Arm Sf. Gheorghe – km 44              | P32-34     | 0      | 0     | 133.2 | 0     | 0 | 3.971  | 73.711 | 22.318 | 0.65  |
| 335. | Sf. Gheorghe Arm km 8                 | D15-038    | 14.8   | 0     | 0     | 0     | 0 | 25.24  | 59.32  | 15.45  | 0.99  |
| 336. | Sf. Gheorghe Arm km 8                 | D11-038    | 44.4   | 7.4   | 7.4   | 0     | 0 | 25.24  | 59.32  | 15.45  | 0.99  |
| 337. | Sf. Gheorghe Arm km 1                 | D15-036    | 0      | 7.4   | 0     | 0     | 0 | 21.734 | 59.841 | 18.425 | 0.04  |
| 338. | Sf. Gheorghe Arm km 1                 | D15-035    | 0      | 44.4  | 0     | 0     | 0 | 21.734 | 59.841 | 18.425 | 0.04  |
| 339. | Sf. Gheorghe Arm km 1                 | D11-035    | 74     | 0     | 0     | 7.4   | 0 | 21.734 | 59.841 | 18.425 | 0.04  |
| 340. | Rectification channel                 | G3-16-004  | 0      | 280   | 0     | 0     | 0 | 98.59  | 1.15   | 0.26   | 0.043 |

|      |                                         |              |       |       |        |       |      |        |        |        |       |
|------|-----------------------------------------|--------------|-------|-------|--------|-------|------|--------|--------|--------|-------|
| 341. | Rectification channel                   | L3-17-037    | 0     | 0     | 133.2  | 0     | 0    | 0.61   | 67.53  | 31.86  | 0.5   |
| 342. | Old Danube (Meander)                    | C16-013      | 0     | 0     | 0      | 168   | 0    | 1.709  | 60.331 | 37.96  | 0.624 |
| 343. | Old Danube (Meander)                    | G2-16-014    | 0     | 0     | 0      | 224   | 0    | 1.709  | 60.331 | 37.96  | 0.624 |
| 344. | Old Danube (Meander)                    | G2-17-016    | 0     | 7.4   | 162.8  | 0     | 0    | 2.53   | 67.894 | 29.576 | 0.515 |
| 345. | Old Danube (Meander)                    | N2-17-041    | 0     | 0     | 22.2   | 0     | 0    | 2.59   | 73.16  | 24.25  | 0.605 |
| 346. | Old Danube (Meander)                    | PM05-21B     | 14.8  | 0     | 14.8   | 0     | 0    | 1.7    | 74.89  | 23.41  | 0.69  |
| 347. | Old Danube (Meander)                    | PM05-21A     | 14.8  | 0     | 14.8   | 0     | 0    | 4.47   | 74.73  | 20.8   | 0.88  |
| 348. | Old Danube (Meander)                    | PM09-21B     | 14.8  | 355.2 | 0      | 0     | 0    | 1.7    | 74.89  | 23.41  | 0.69  |
| 349. | Old Danube (Meander)                    | PM09-21A     | 7.4   | 88.8  | 7.4    | 29.6  | 0    | 4.47   | 74.73  | 20.8   | 0.88  |
| 350. | Old Danube (Meander)                    | P51-53       | 0     | 0     | 25     | 0     | 0    | 7.61   | 73.40  | 18.98  | 0.57  |
| 351. | Arm Sf. Gheorghe - enter                | P25-27       | 0     | 0     | 0      | 14.8  | 0    | 13.572 | 66.689 | 19.739 | 0.183 |
| 352. | Arm Sf. Gheorghe – Big M                | P11-13       | 0     | 0     | 100    | 0     | 0    | 2.53   | 76.46  | 21.01  | 0.73  |
| 353. | Cut off 2-Est                           | DD18-181     | 0     | 29.6  | 0      | 0     | 0    | 4.02   | 69.429 | 26.551 | 0.45  |
| 354. | Gârla Turcească/Old Lighthouse          | DD18-170     | 0     | 66.6  | 0      | 0     | 0    | 8.31   | 68.472 | 23.22  | 0.7   |
| 355. | Sacalin Bay                             | DD18-172     | 0     | 50.4  | 176.4  | 0     | 0.17 | 96.64  | 2.71   | 0.48   | 0.73  |
| 356. | Arm Sf. Gheorghe - Enter Channel Tătaru | DD18-167     | 0     | 100.8 | 0      | 0     | 1.17 | 98.76  | 0.07   | 0      | 0.146 |
| 357. | Channel Tătaru/ Central Channel         | DD18-168     | 0     | 100.8 | 75.6   | 0     | 0    | 28.05  | 56.93  | 15.03  | 0.36  |
| 358. | Channel Tătaru                          | DD18-096     | 0     | 680.4 | 2998.8 | 0     | 0    | 28.05  | 56.93  | 15.03  | 0.36  |
| 359. | Arm Tătaru                              | DD19-007     | 100.8 | 151.2 | 630    | 982.8 | 0    | 28.05  | 56.93  | 15.03  | 0.36  |
| 360. | Arm Tătaru                              | DD20-007     | 175   | 0     | 225    | 0     | 0    | 28.05  | 56.93  | 15.03  | 0.36  |
| 361. | Sacalin Bay -Channel Ciotic             | DD20-130     | 25    | 0     | 0      | 0     | 0    | 0.35   | 48.87  | 50.78  | 0.43  |
| 362. | Channel Mustaca-Lake Razelm             | DD20-140     | 0     | 25    | 0      | 0     | 0    | 21.051 | 61.366 | 17.583 | 0.16  |
| 363. | Uzlina Channel                          | CU1-16-019   | 168   | 616   | 392    | 0     | 0    | 7.82   | 70.89  | 21.29  | 2.08  |
| 364. | Uzlina Channel                          | CU1-17-019   | 14.8  | 0     | 59.2   | 22.2  | 0    | 7.82   | 70.89  | 21.29  | 2.08  |
| 365. | Uzlina Lake                             | L02 Van Veen | 0     | 0     | 425    | 0     | 0    | 5.87   | 71.79  | 22.34  | 0.86  |
| 366. | Uzlina Lake                             | L02 Net      | 0     | 0     | 0      | 43    | 0    | 5.87   | 71.79  | 22.34  | 0.86  |
| 367. | Uzlina Lake                             | LU2-16-022   | 336   | 1120  | 0      | 56    | 0    | 5.87   | 71.79  | 22.34  | 0.86  |
| 368. | Channel 44                              | L07          | 0     | 0     | 25     | 25    | 0    | 21.89  | 64.75  | 13.36  | 0.175 |

**Supplementary Materials S2.** The distribution of the freshwater bivalves *Corbicula fluminea* and *Dreissena polymorpha* on the Lower Danube River and Danube Delta (Coordinates).

| Crt. No. | Location                         | Station  | Coordinates |             |
|----------|----------------------------------|----------|-------------|-------------|
|          |                                  |          | Longitude   | Latitude    |
| 369.     | Km 1072 Bazias                   | D109-204 | 44°48'15.9" | 21°23'24.8" |
| 370.     | Km 1072 Bazias                   | D15-182  | 44°48'15.9" | 21°23'24.8" |
| 371.     | Km 1072 Bazias                   | D12-195  | 44°48'15.9" | 21°23'24.8" |
| 372.     | Km 1072 Bazias                   | D11-191  | 44°48'15.9" | 21°23'24.8" |
| 373.     | Km 1072 Bazias                   | D10-143  | 44°48'15.9" | 21°23'24.8" |
| 374.     | Km 1059 Belobresca               | D15-180  | 44°46'08.7" | 21°31'19.9" |
| 375.     | Km 1059 Belobresca               | D10-039  | 44°46'08.7" | 21°31'19.9" |
| 376.     | Km 1059 Belobresca               | D10-142  | 44°46'08.7" | 21°31'19.9" |
| 377.     | Km 1050 Moldova Veche            | D11-185  | 44°43'40.1" | 21°36'50.4" |
| 378.     | Km 1050 Moldova Veche            | D10-141  | 44°43'40.1" | 21°36'50.4" |
| 379.     | Km 1046 Moldova veche Downstream | D15-173  | 44°42'38.5" | 21°38'08.9" |
| 380.     | Km 1046 Moldova veche Downstream | D14-186  | 44°42'38.5" | 21°38'08.9" |
| 381.     | Km 1046 Moldova veche Downstream | D11-184  | 44°42'38.5" | 21°38'08.9" |
| 382.     | Km 1046 Moldova veche Downstream | D10-140  | 44°42'38.5" | 21°38'08.9" |
| 383.     | Km 1039 Papagaia                 | D15-170  | 44°39'52.3" | 21°41'45.7" |
| 384.     | Km 1039 Papagaia                 | D14-185  | 44°39'52.3" | 21°41'45.7" |
| 385.     | Km 1039 Papagaia                 | D14-183  | 44°39'52.3" | 21°41'45.7" |
| 386.     | Km 1039 Papagaia                 | D14-183  | 44°39'52.3" | 21°41'45.7" |
| 387.     | Km 1039 Papagaia                 | D11-180  | 44°39'52.3" | 21°41'45.7" |
| 388.     | Km 1039 Papagaia                 | D11-179  | 44°39'52.3" | 21°41'45.7" |
| 389.     | Km 1039 Papagaia                 | D10-139  | 44°39'52.3" | 21°41'45.7" |
| 390.     | km 974                           | D109-178 | 44°35'19.5" | 22°15'12.2" |
| 391.     | Km 965 Tabula Traiana            | D109-175 | 44°40'59.1" | 22°23'28.0" |

|      |                              |           |             |              |
|------|------------------------------|-----------|-------------|--------------|
| 392. | Km 965 Tabula Traiana        | D10-132   | 44°40'59.1" | 22°23'28.0"  |
| 393. | Km 957 Orsova                | D10-131   | 44°40'59.1" | 22°23'28.0"  |
| 394. | km 953.5 Cerna River         | D11-172   | 44°44'37,0" | 22°24'15,4 " |
| 395. | Km 951 Downstream Orsova Bay | D109-163  | 44°42'46.6" | 22°25'54.4"  |
| 396. | Km 951 Downstream Orsova Bay | D15-163   | 44°42'46.6" | 22°25'54.4"  |
| 397. | Km 951 Downstream Orsova Bay | D11-170   | 44°42'46.6" | 22°25'54.4"  |
| 398. | Km 951 Downstream Orsova Bay | D16-032   | 44°42'46.6" | 22°25'54.4"  |
| 399. | Km 951 Downstream Orsova Bay | D109-162  | 44°42'46.6" | 22°25'54.4"  |
| 400. | Km 951 Downstream Orsova Bay | D109-161  | 44°42'46.6" | 22°25'54.4"  |
| 401. | Km 951 Downstream Orsova Bay | D10-128   | 44°42'46.6" | 22°25'54.4"  |
| 402. | Km 951 Downstream Orsova Bay | D10-127   | 44°42'46.6" | 22°25'54.4"  |
| 403. | Km. 947 Upstream Iron Gate I | D109-157  | 44°41'34.5" | 22°29'27.9"  |
| 404. | Km. 947 Upstream Iron Gate I | D13-094   | 44°41'34.5" | 22°29'27.9"  |
| 405. | km 944                       | D109-153  | 44°39'43,5" | 22°32'8,4"   |
| 406. | Km 942                       | D1-18-130 | 44°40'4.7"  | 22°32'40.6"  |
| 407. | Km 943                       | D2-18-138 | 44°39'44,6" | 22°32'3,5"   |
| 408. | Km 940.5                     | D2-18-114 | 44°39'39,7" | 22°33'19,3"  |
| 409. | Km 940                       | D2-18-111 | 44°39'14.4" | 22°33'38.4"  |
| 410. | Km 941                       | D1-18-118 | 44°39'14.4" | 22°33'38,4"  |
| 411. | Km 939                       | D1-18-114 | 44°38'40.7" | 22°33'31.4"  |
| 412. | Km 938                       | D2-18-122 | 44°38'39.0" | 22°34'18.7"  |
| 413. | Km 937 Gura Vaii             | D1-18-103 | 44°38'02.0" | 22°35'06.6"  |
| 414. | Km 937 Gura Vaii             | D2-18-098 | 44°38'02.0" | 22°35'06.6"  |
| 415. | Km 937 Gura Vaii             | D109-150  | 44°38'02.0" | 22°35'06.6"  |
| 416. | Km 937 Gura Vaii             | D109-148  | 44°38'02.0" | 22°35'06.6"  |
| 417. | Km 937 Gura Vaii             | D15-155   | 44°38'02.0" | 22°35'06.6"  |

|      |                              |           |             |             |
|------|------------------------------|-----------|-------------|-------------|
| 418. | Km 937 Gura Vaii             | D15-154   | 44°38'02.0" | 22°35'06.6" |
| 419. | Km 937 Gura Vaii             | D15-155   | 44°38'02.0" | 22°35'06.6" |
| 420. | Km 937 Gura Vaii             | D12-167   | 44°38'02.0" | 22°35'06.6" |
| 421. | Km 937 Gura Vaii             | D11-163   | 44°38'02.0" | 22°35'06.6" |
| 422. | Km 937 Gura Vaii             | D11-164   | 44°38'02.0" | 22°35'06.6" |
| 423. | Km 937 Gura Vaii             | D10-124   | 44°38'02.0" | 22°35'06.6" |
| 424. | Km 936                       | D1-18-094 | 44°37'25.9" | 22°35'28.3" |
| 425. | Km 929 Turnu Severin         | D109-146  | 44°37'20.8" | 22°40'05.0" |
| 426. | Km 929 Turnu Severin         | D15-150   | 44°37'20.8" | 22°40'05.0" |
| 427. | Km 929 Turnu Severin         | D14-166   | 44°37'20.8" | 22°40'05.0" |
| 428. | Km 929 Turnu Severin         | D 12-165  | 44°37'20.8" | 22°40'05.0" |
| 429. | Km 929 Turnu Severin         | D11-161   | 44°37'20.8" | 22°40'05.0" |
| 430. | Km 929 Turnu Severin         | D10-123   | 44°37'20.8" | 22°40'05.0" |
| 431. | Km 924 Simian                | D15-148   | 44°35'27.8" | 22°43'38.3" |
| 432. | Km 924 Simian                | D15-147   | 44°35'27.8" | 22°43'38.3" |
| 433. | Km 924 Simian                | D10-121   | 44°35'27.8" | 22°43'38.3" |
| 434. | Km 924 Simian                | D14-160   | 44°35'27.8" | 22°43'38.3" |
| 435. | Km 924 Simian                | D13-083   | 44°35'27.8" | 22°43'38.3" |
| 436. | Km 924 Simian                | D11-156   | 44°35'27.8" | 22°43'38.3" |
| 437. | Km 924 Simian                | D11-157   | 44°35'27.8" | 22°43'38.3" |
| 438. | Km 924 Simian                | D10-121   | 44°35'27.8" | 22°43'38.3" |
| 439. | Km 866 Upstream Iron Gate II | D109-140  | 44°19'27.4" | 22°32'28.6" |
| 440. | Km 866 Upstream Iron Gate II | D15-144   | 44°19'27.4" | 22°32'28.6" |
| 441. | Km 866 Upstream Iron Gate II | D14-157   | 44°19'27.4" | 22°32'28.6" |
| 442. | Km 866 Upstream Iron Gate II | D13-080   | 44°19'27.4" | 22°32'28.6" |
| 443. | Km 866 Upstream Iron Gate II | D 12- 157 | 44°19'27.4" | 22°32'28.6" |



|      |                              |           |             |             |
|------|------------------------------|-----------|-------------|-------------|
| 444. | Km 866 Upstream Iron Gate II | D11-153   | 44°19'27.4" | 22°32'28.6" |
| 445. | Km 866 Upstream Iron Gate II | D11-153   | 44°19'27.4" | 22°32'28.6" |
| 446. | Km 866 Upstream Iron Gate II | D10-120   | 44°19'27.4" | 22°32'28.6" |
| 447. | Km 845.5 Gura Timokului      | D10-119   | 44°12'29,8" | 22°40'54,5" |
| 448. | km 824.5                     | D3-17-034 | 44°07'26"   | 22°52'47"   |
| 449. | Km 824 Jasen (BG)            | D10-117   | 44°07'32"   | 22°53'29"   |
| 450. | km 824                       | D3-17-031 | 44°07'32"   | 22°53'29"   |
| 451. | km 823.5                     | D3-17-028 | 44°07'23"   | 22°53'43"   |
| 452. | km 823                       | D3-17-025 | 44°06'42"   | 22°53'52"   |
| 453. | km 822.5                     | D3-17-022 | 44°06'41"   | 22°53'86"   |
| 454. | km 821.5                     | D3-17-016 | 44°06'34"   | 22°54'36"   |
| 455. | km 821                       | D3-17-013 | 44°06'04"   | 22°55'03"   |
| 456. | km 820                       | D3-17-007 | 44°06'11"   | 22°56'04"   |
| 457. | Km 819.5                     | D3-17-004 | 44°05'52"   | 22°56'17"   |
| 458. | Km 819.5                     | D2-18-063 | 44°05'52"   | 22°56'17"   |
| 459. | km 819                       | D3-17-001 | 44°06'08"   | 22°56'42"   |
| 460. | Km 811                       | D2-19-130 | 44°4'53.2"  | 23°1'48.8"  |
| 461. | Km 808.5                     | D1-20-115 | 44°3'49.7"  | 23°3'7.4"   |
| 462. | Km 808                       | D2-19-114 | 44°3'49.7"  | 23°3'7.4"   |
| 463. | Km 809                       | D2-20-114 | 44°03'48.5" | 23°03'05.9" |
| 464. | Km 810                       | D1-20-114 | 44°03'50.7" | 23°03'09.6" |
| 465. | Km 807.5                     | D2-20-111 | 44°3'35.6"  | 23°2'59.1"  |
| 466. | Km 807                       | D1-20-108 | 44°3'20.3"  | 23°2'49.7"  |
| 467. | Km 806                       | D2-19-100 | 44°2'55.3"  | 23°2'14.5"  |
| 468. | Km 807                       | D2-19-102 | 44°3'20.3"  | 23°2'49.7"  |
| 469. | Km 808                       | D2-20-102 | 44°3'49.7"  | 23°3'7.4"   |

|      |                           |               |             |             |
|------|---------------------------|---------------|-------------|-------------|
| 470. | Km 809                    | D1-20-102     | 44°02'49.3" | 23°02'34.6" |
| 471. | Km 805                    | D2-19-094     | 44°2'18.7"  | 23°2'8.6"   |
| 472. | Km 806                    | D2-20-094     | 44°2'55.3"  | 23°2'14.5"  |
| 473. | Km 807                    | D1-20-096     | 44°3'20.3"  | 23°2'49.7"  |
| 474. | Km 794 Downstream Calafat | D15-132       | 43°57'52,5" | 22°52'39,9" |
| 475. | Km 794 Downstream Calafat | D14-131       | 43°57'52,5" | 22°52'39,9" |
| 476. | Km 794 Downstream Calafat | D13-055       | 43°57'52,5" | 22°52'39,9" |
| 477. | Km 794 Downstream Calafat | D12-132       | 43°57'52,5" | 22°52'39,9" |
| 478. | Km 794 Downstream Calafat | D10-113       | 43°57'52,5" | 22°52'39,9" |
| 479. | Km 765                    | D2-19-091     | 43°48'36.2" | 22°57'48.3" |
| 480. | Km 766                    | D2-19-093Bis  | 43°48'18.2" | 22°57'34.3" |
| 481. | Km 764.5                  | D2-19-089 Bis | 43°48'12.7" | 22°58'5.8"  |
| 482. | Km 764.5                  | D2-19-088 Bis | 43°48'12.7" | 22°58'5.8"  |
| 483. | Km 764                    | D2-19-087 Bis | 43°48'5.7"  | 22°58'35.5" |
| 484. | Km 763.5                  | D2-20-082 bis | 43°48'1.4"  | 22°58'52.7" |
| 485. | Km 763.5                  | D1-20-082 bis | 43°48'1.4"  | 22°58'52.7" |
| 486. | Km 762.5                  | D19-078       | 43°48'34.5" | 22°59'54.0" |
| 487. | Km 762.5                  | D1-20-076 bis | 43°48'34.5" | 22°59'54.0" |
| 488. | Km 762                    | D19-073       | 43°48'31,4" | 23°0'18,8"  |
| 489. | Km 763                    | D1-20-073     | 43°48'1.4"  | 22°58'52.7" |
| 490. | Km 764                    | D2-19-075     | 43°48'5.7"  | 22°58'35.5" |
| 491. | Km 761                    | D2-19-069     | 43°48'14.3" | 23°0'54.4"  |
| 492. | Km 760                    | D2-19-063     | 43°47'58.4" | 23°01'45.9" |
| 493. | Km 761                    | D2-20-063 bis | 43°48'14.3" | 23°0'54.4"  |
| 494. | Km 762                    | D1-20-063 bis | 43°47'58.4" | 23°1'45.9"  |
| 495. | Km 709 Upstream Jiu River | D14-128       | 43°47'22.7" | 23°36'50.4" |

|      |                             |           |             |             |
|------|-----------------------------|-----------|-------------|-------------|
| 496. | Km 709 Upstream Jiu River   | D11-130   | 43°47'22.7" | 23°36'50.4" |
| 497. | Km 709 Upstream Jiu River   | D10-112   | 43°47'22.7" | 23°36'50.4" |
| 498. | Km 692 Downstream Jiu River | D2-16-029 | 43°46'43.8" | 23°48'41.7" |
| 499. | km 691.5 Jiu River          | D2-16-022 | 43°45'38.5" | 23°50'1.3"  |
| 500. | km 691.5 Jiu River          | D11-127   | 43°45'38.5" | 23°50'1.3"  |
| 501. | km 681 Upstream Bechet      | D14-122   | 43°44'32,8" | 23°56'22,8" |
| 502. | km 681 Upstream Bechet      | D11-123   | 43°44'32,8" | 23°56'22,8" |
| 503. | Km 687 Kozlodui             | D2-16-019 | 43°45'10.4" | 23°51'33.0" |
| 504. | Km 687 Kozlodui             | D14-124   | 43°45'10.4" | 23°51'33.0" |
| 505. | Km 687 Kozlodui             | D11-125   | 43°45'10.4" | 23°51'33.0" |
| 506. | Km 687 Kozlodui             | D10-110   | 43°45'10.4" | 23°51'33.0" |
| 507. | Km 678 Downstream Bechet    | D2-16-017 | 43°44'27.6" | 23°58'3.0"  |
| 508. | Km 678 Downstream Bechet    | D1-20-060 | 43°44'27.6" | 23°58'3.0"  |
| 509. | Km 678 Downstream Bechet    | D2-19-058 | 43°44'27.6" | 23°58'3.0"  |
| 510. | Km 676.5                    | D2-18-049 | 43°44'15.6" | 23°59'40.5" |
| 511. | Km 676.5                    | D1-20-049 | 43°44'15.6" | 23°59'40.5" |
| 512. | Km 676                      | D2-20-046 | 43°44'45,6" | 23°59'24,7" |
| 513. | Km 677                      | D19-046   | 43°44'12,9" | 23°59'1,8"  |
| 514. | Km 675.5                    | D1-18-043 | 43°44'39,4" | 23°59'42,6" |
| 515. | Km 675.5                    | D2-19-045 | 43°44'39,4" | 23°59'42,6" |
| 516. | Km 675                      | D2-19-40  | 43°44'24,5" | 24°0'19,6"  |
| 517. | Km 674.5                    | D19-039   | 43°44'24,5" | 24°0'19,6"  |
| 518. | Km 674                      | D2-19-034 | 43°44'13.7" | 24°0'41,9"  |
| 519. | Km 635 Upstream Corabia     | D13-041   | 43°44'36,0" | 24°27'41,3" |
| 520. | Km 635 Upstream Corabia     | D10-108   | 43°44'36,0" | 24°27'41,3" |
| 521. | Km 630                      | D1-20-027 | 43°46'15.2" | 24°30'42.8" |

|      |                                  |            |             |             |
|------|----------------------------------|------------|-------------|-------------|
| 522. | Km 629                           | D19-020    | 43°45'33.4" | 24°31'25.1" |
| 523. | Km 630                           | D1-18-021  | 43°46'15.2" | 24°30'42.8" |
| 524. | Km 628                           | D1-20-014  | 43°46'14.3" | 24°32'21.5" |
| 525. | Km 629                           | D2-20-015  | 43°45'33.4" | 24°31'25.1" |
| 526. | Km 627.5                         | D1-20-011  | 43°45'17.2" | 24°32'34.2" |
| 527. | Km 627                           | D1-20- 009 | 43°45'25.3" | 24°33'15.6" |
| 528. | Km 628                           | D19-008    | 43°46'14.3" | 24°32'21.5" |
| 529. | Km 629                           | D2-20-008  | 43°45'33.4" | 24°31'25.1" |
| 530. | Km 630                           | D1-18-007  | 43°46'15.2" | 24°30'42.8" |
| 531. | Km 626.5                         | D2-19-004  | 43°45'13.9" | 24°33'16.2" |
| 532. | Km 626                           | D2-18-003  | 43°45'37.3" | 24°33'47.0" |
| 533. | Km 627                           | D2-19-001  | 43°45'25.3" | 24°33'15.6" |
| 534. | Km 628                           | D2-19-002  | 43°46'14.3" | 24°32'21.5" |
| 535. | Km 629                           | D2-20-003  | 43°45'33.4" | 24°31'25.1" |
| 536. | Km 630                           | D1-18-002  | 43°46'15.2" | 24°30'42.8" |
| 537. | Km 631                           | D1-18-001  | 43°45'7.0"  | 24°33'36.0" |
| 538. | Km 632                           | D2-16-004  | 43°42'12.9" | 24°52'4.2"  |
| 539. | km 604.4 Olt River               | D2-16-005  | 43°42'35.1" | 24°52'2.9"  |
| 540. | km 604.4 Olt River               | D2-16-008  | 43°42'35.1" | 24°52'2.9"  |
| 541. | km 604.4 Olt River               | D2-16-013  | 43°42'35.1" | 24°52'2.9"  |
| 542. | km 604.4 Olt River               | D13-037    | 43°42'35.1" | 24°52'2.9"  |
| 543. | km 604.4 Olt River               | D11-114    | 43°42'35.1" | 24°52'2.9"  |
| 544. | km 595 Downstream Turnu Magurele | D2-16-002  | 43°43'4.7"  | 24°55'2.2"  |
| 545. | km 595 Downstream Turnu Magurele | D11-110    | 43°43'4.7"  | 24°55'2.2"  |
| 546. | Km 551 Downstream Zimnicea       | D15-105    | 43°37'00,1" | 25°23'35,7" |
| 547. | Km 551 Downstream Zimnicea       | D14-105    | 43°37'00,1" | 25°23'35,7" |

|      |                                  |          |              |             |
|------|----------------------------------|----------|--------------|-------------|
| 548. | Km 551 Downstream Zimnicea       | D13-028  | 43°37'00,1"  | 25°23'35,7" |
| 549. | Km 551 Downstream Zimnicea       | D11-107  | 43°37'00,1"  | 25°23'35,7" |
| 550. | Km 551 Downstream Zimnicea       | D10-103  | 43°37'00,1"  | 25°23'35,7" |
| 551. | Km. 557 Upstream Zimnicea        | D15-109  | 43°38'30.3"  | 25°19'38.5" |
| 552. | Km. 557 Upstream Zimnicea        | D14-109  | 43°38'30.3"  | 25°19'38.5" |
| 553. | Km. 557 Upstream Zimnicea        | D 12-109 | 43°38'30.3"  | 25°19'38.5" |
| 554. | Km 500 Upstream Ruse Giurgiu     | D10-101  | 43°49'25,6"  | 25°55'18,8" |
| 555. | Km. 481 Downstream Giurgiu       | D13-022  | 43°55'45,7"  | 26°04'27,5" |
| 556. | Km 428 Dowsntream Oltenita       | D15-094  | 44°03'30,8"  | 26°39'49,7" |
| 557. | Km 428 Dowsntream Oltenita       | D13-018  | 44°03'30,8"  | 26°39'49,7" |
| 558. | Km 428 Dowsntream Oltenita       | D10-094  | 44°03'30,8"  | 26°39'49,7" |
| 559. | Km. 375 Chiciu-Silistra          | D15-091  | 44° 07'42.6" | 27°15'44.6" |
| 560. | Km. 375 Chiciu-Silistra          | D14-091  | 44° 07'42.6" | 27°15'44.6" |
| 561. | Km. 348 Ivoarele                 | D15-84   | 44° 10'14.8" | 27°32'21.6" |
| 562. | Km. 348 Ivoarele                 | D14-087  | 44° 10'14.8" | 27°32'21.6" |
| 563. | Km. 348 Ivoarele                 | D13-011  | 44° 10'14.8" | 27°32'21.6" |
| 564. | km 294 Seimeni                   | D15-074  | 44°25'57.7"  | 28°02'25.1" |
| 565. | km 294 Seimeni                   | D15-074  | 44°25'57.7"  | 28°02'25.1" |
| 566. | km 294 Seimeni                   | D14-074  | 44°25'57.7"  | 28°02'25.1" |
| 567. | km 294 Seimeni                   | D14-074  | 44°25'57.7"  | 28°02'25.1" |
| 568. | km 294 Seimeni                   | D14-074  | 44°25'57.7"  | 28°02'25.1" |
| 569. | km 294 Seimeni                   | D11-074  | 44°25'57.7"  | 28°02'25.1" |
| 570. | km 239 Upstream Giurgieni Bridge | D11-066  | 44° 44'55,6" | 27°52'16,2" |
| 571. | km 239 Upstream Giurgieni Bridge | D10-061  | 44° 44'55,6" | 27°52'16,2" |
| 572. | Channel Danube - Black Sea       | D13-001  | 44°19'18.8"  | 28°02'38.8" |
| 573. | Mm 54 Isaccea                    | D14-041  | 45° 16'20,1" | 28°29'43,9" |

|      |                                |           |             |             |
|------|--------------------------------|-----------|-------------|-------------|
| 574. | km 253 Upstream Harsova        | D15-071   | 44°40'39.7" | 27°56'51.1" |
| 575. | km 253 Upstream Harsova        | D14-071   | 44°40'39.7" | 27°56'51.1" |
| 576. | km 253 Upstream Harsova        | D11-071   | 44°40'39.7" | 27°56'51.1" |
| 577. | km 253 Upstream Harsova        | D10-071   | 44°40'39.7" | 27°56'51.1" |
| 578. | km 247 Downstream Harsova      | D14-068   | 44°42'09,8" | 27°53'42,9" |
| 579. | km 247 Downstream Harsova      | D14-069   | 44°42'09,8" | 27°53'42,9" |
| 580. | km 247 Downstream Harsova      | D12-068   | 44°42'09,8" | 27°53'42,9" |
| 581. | km 247 Downstream Harsova      | D11-068   | 44°42'09,8" | 27°53'42,9" |
| 582. | km 247 Downstream Harsova      | D10-068   | 44°42'09,8" | 27°53'42,9" |
| 583. | Km. 159 Upstream Siret         | D14-049   | 45°22'23.5" | 28°01'36.4" |
| 584. | Km. 155 Siret River            | D14-048   | 45°24'06,3" | 28°01'06,0" |
| 585. | Km. 2 (246) Borcea Arm         | D14-062   | 44°41'50,9" | 27°51'34,8" |
| 586. | Km. 94+400 Călărași-Borcea Arm | D14-090   | 44°11'17,1" | 27°19'59,5" |
| 587. | Km. 94+400 Călărași-Borcea Arm | D13-014   | 44°11'17,1" | 27°19'59,5" |
| 588. | km 174 Upstream Braila         | D14-059   | 45°14'38,7" | 27°58'04,6" |
| 589. | km 174 Upstream Braila         | D 12-058  | 45°14'38,7" | 27°58'04,6" |
| 590. | km 174 Upstream Braila         | D11-058   | 45°14'38,7" | 27°58'04,6" |
| 591. | km 174 Upstream Braila         | D10-058   | 45°14'38,7" | 27°58'04,6" |
| 592. | km 167 Downstream Braila       | D 12-052  | 45°18'13.9" | 28°00'05.4" |
| 593. | km 167 Downstream Braila       | D11-052   | 45°18'13.9" | 28°00'05.4" |
| 594. | Km 100+ 200m – Ostrov Arm      | D1-17-028 | 45°8'43,2"  | 28°57'8,1"  |
| 595. | km 4 Macin Arm                 | D14-056   | 45°15'42.2" | 28°01'53.7" |
| 596. | km 4 Macin Arm                 | D12-056   | 45°15'42.2" | 28°01'53.7" |
| 597. | km 4 Macin Arm                 | D11-056   | 45°15'42.2" | 28°01'53.7" |
| 598. | km 4 Macin Arm                 | D10-055   | 45°15'42.2" | 28°01'53.7" |
| 599. | Ceatal Izmail – Mm 43,5        | DD20-100  | 45°13'26.1" | 28°43'36.1" |

|      |                              |            |             |             |
|------|------------------------------|------------|-------------|-------------|
| 600. | Ceatal Izmail – Mm 43,5      | DD19-118   | 45°13'26.1" | 28°43'36.1" |
| 601. | Ceatal Izmail – Mm 43,5      | DD18-078   | 45°13'26.1" | 28°43'36.1" |
| 602. | Ceatal Izmail – Mm 43,5      | DD20-017   | 45°13'26.1" | 28°43'36.1" |
| 603. | Ceatal Izmail – Mm 43,5      | D15-015    | 45°13'26.1" | 28°43'36.1" |
| 604. | Ceatal Izmail – Mm 43,5      | D15-015    | 45°13'26.1" | 28°43'36.1" |
| 605. | Ceatal Izmail – Mm 43,5      | D11-015    | 45°13'26.1" | 28°43'36.1" |
| 606. | Arm Tulcea – Mm 42,5         | D15-017    | 45°13'16.9" | 28°44'49.0" |
| 607. | Arm Tulcea – Mm 42,5         | D14-017    | 45°13'16.9" | 28°44'49.0" |
| 608. | Arm Tulcea – Mm 42,5         | DD19-124   | 45°13'16.9" | 28°44'49.0" |
| 609. | Arm Tulcea – Mm 42,5         | DD18-083   | 45°13'16.9" | 28°44'49.0" |
| 610. | Arm Tulcea – Mm 42,5         | DD20-020   | 45°13'16.9" | 28°44'49.0" |
| 611. | Arm Tulcea – Mm 42,5         | DD20-106   | 45°13'16.9" | 28°44'49.0" |
| 612. | Arm Tulcea - Mm 37,5         | DD18-128   | 45°12'01.7" | 28°49'14.0" |
| 613. | Arm Tulcea - Mm 37,5         | DD19-129   | 45°12'01.7" | 28°49'14.0" |
| 614. | Arm Tulcea - Mm 37,5         | DD20-25    | 45°12'01.7" | 28°49'14.0" |
| 615. | Arm Tulcea - Mm 37,5         | DD19-025   | 45°12'01.7" | 28°49'14.0" |
| 616. | Arm Tulcea - Mm 37,5         | DD20-111   | 45°12'01.7" | 28°49'14.0" |
| 617. | Arm Tulcea - Mm 35           | DD19-026   | 45°11'53.9" | 28°52'20.1" |
| 618. | Arm Tulcea - Mm 35           | DD20-026   | 45°11'53.9" | 28°52'20.1" |
| 619. | Arm Tulcea - Mm 35           | DD20-114   | 45°11'53.9" | 28°52'20.1" |
| 620. | Arm Tulcea                   | PO1TU09-44 | 45°11'13.5" | 28°53'12.4" |
| 621. | Km. 115 Arm Chilia           | D15-011    | 45°14'11.8" | 28°45'07.4" |
| 622. | Km. 115 Arm Chilia           | D14-012    | 45°14'11.8" | 28°45'07.4" |
| 623. | Km. 115 – Arm Chilia         | DD19-121   | 45°14'11.8" | 28°45'07.4" |
| 624. | Arm Chilia – km 80 - Pardina | DD20-010   | 45°18'18.4" | 28°57'09.3" |
| 625. | Arm Chilia – km 80 - Pardina | DD19-008   | 45°18'18.4" | 28°57'09.3" |

|      |                                 |             |               |              |
|------|---------------------------------|-------------|---------------|--------------|
| 626. | Pardina                         | DD18-090    | 45°18'16.4"   | 28°57'08.3"  |
| 627. | Km. 40 Downstream Chilia        | D15-008     | 45°26'46,7"   | 29° 20'22.6" |
| 628. | Km. 40 Downstream Chilia        | D15-009     | 45°26'46,7"   | 29° 20'22.6" |
| 629. | Km. 40 Downstream Chilia        | D15-008     | 45°26'46,7"   | 29° 20'22.6" |
| 630. | Km. 40 Downstream Chilia        | D14-009     | 45°26'46,7"   | 29° 20'22.6" |
| 631. | Km. 40 Downstream Chilia        | D14-014     | 45°26'46,7"   | 29° 20'22.6" |
| 632. | Km 20 Vâlcov                    | D14-005     | 45° 23'53,8"  | 29° 34'01,6" |
| 633. | Km 20 Vâlcov                    | D12-005     | 45° 23'53,8"  | 29° 34'01,6" |
| 634. | Km. 3 Old Stambul               | D15-003     | 45°16'05,1"   | 29°40'38,6"  |
| 635. | Old Chilia                      | DD18-093    | 45°25'36.6"   | 29°17'34.7"  |
| 636. | Arm Chilia – km 45 - Old Chilia | DD19-004    | 45°25'33.18"  | 29°17'7.26"  |
| 637. | Arm Chilia – km 45 - Old Chilia | DD20-004    | 45°25'33.18"  | 29°17'7.26"  |
| 638. | Arm Chilia – km 23 - Periprava  | DD19-001    | 45°24'43.5"   | 29°32'17.5"  |
| 639. | Arm Chilia – km 23 - Periprava  | DD20-003    | 45°24'43.5"   | 29°32'17.5"  |
| 640. | Arm Chilia – km 23 - Periprava  | DD18 -97    | 45°24'43.5"   | 29°32'17.5"  |
| 641. | Arm Chilia – km 23 - Periprava  | DD19-003    | 45°24'43.5"   | 29°32'17.5"  |
| 642. | Arm Sulina                      | P05SU05-026 | 45°10'33,3"   | 29°19'05,5"  |
| 643. | Arm Sulina                      | P12-09-03   | 45°09'37,8"   | 29°36'31,2"  |
| 644. | Arm Sulina                      | PO3SU09-34  | 45°10'29,9"   | 29°03'19,3"  |
| 645. | Arm Sulina                      | PO2SU09-37  | 45°11'22,8"   | 28°55'22,3"  |
| 646. | Arm Sulina                      | PO2SU09-36  | 45°11'23,8 "N | 28°55'26,6"E |
| 647. | Arm Sulina                      | P10-SU05-08 | 45°10'36,9"   | 29°28'28,0"  |
| 648. | Arm Sulina                      | D2PO2       | 45°11'16.9"   | 28°54'20.3"  |
| 649. | Arm Sulina                      | D2FO2       | 45°11'16.9"   | 28°54'20.3"  |
| 650. | Arm Sulina                      | D1TO2       | 45°10'26.5"   | 29° 02'56.7" |
| 651. | Arm Sulina                      | D1FO2       | 45°10'26.5"   | 29° 02'56.7" |



|      |                                             |             |              |              |
|------|---------------------------------------------|-------------|--------------|--------------|
| 652. | Arm Sulina (Meander)                        | P07SU05-017 | 45°10'35,6"  | 29°21'20,4"  |
| 653. | Arm Sulina (Meander)                        | P10SU09-09  | 45°10'39,4"  | 29°28'33,2"  |
| 654. | Arm Sulina - Crișan                         | P08SU05-015 | 45°10'30,9"  | 29°21'39,6"  |
| 655. | Arm Sulina - Crișan                         | DD18-143    | 45°10'33.7"  | 29°21'16.7"  |
| 656. | Arm Sulina - Crișan                         | DD18-150    | 45°09'37.0"  | 29°36'27.9"  |
| 657. | Arm Sulina - Crișan                         | P03SU05-033 | 45°10'28,5"  | 29°03'19,4"  |
| 658. | Arm Sulina - Mm 0                           | DD20-036    | 45°09'28.0"  | 29°40'09.7"  |
| 659. | Arm Sulina - Mm 14                          | DD20-043    | 45°10'32.9"  | 29°20'38.6"  |
| 660. | Hm 72 Channel Sulina                        | D15-029     | 45°08'54,2"  | 29° 45'45,4" |
| 661. | Channel Sulina                              | P04SU05-031 | 45°10'54,2"  | 29°10'19,1"  |
| 662. | Mila 2.8 Sulina                             | D15-032     | 45°09'38.9"  | 29°36'30.1"  |
| 663. | Mila 2.8 Sulina                             | D14-034     | 45°09'38.9"  | 29°36'30.1"  |
| 664. | Mila 2.8 Sulina                             | D14-033     | 45°09'38.9"  | 29°36'30.1"  |
| 665. | Mila 2.8 Sulina                             | D10-032     | 45°09'38.9"  | 29°36'30.1"  |
| 666. | Mila 33.5 Arm Sulina                        | D13-170     | 45° 11'14,5" | 28° 54'00,0" |
| 667. | Arm Sulina downstream/ Meteo station Sulina | DD18-156    | 45°09'39.0"  | 29°44'02.2"  |
| 668. | Old Danube (Arm Sulina - Crișan)            | DD18-140    | 45°10'35.7"  | 29°21'21.3"  |
| 669. | Channel Caraorman                           | DD18-148    | 45°10'21.8"  | 29°20'38.2"  |
| 670. | Channel Caraorman                           | DD18-144    | 45°04'42.5"  | 29°24'40.8"  |
| 671. | Channel Caraorman                           | DD19-178    | 45°04'44.0"  | 29°24'39.6"  |
| 672. | Channel Caraorman                           | DD20-50     | 45°03'14.4"  | 29°27'49.9"  |
| 673. | Channel Caraorman                           | DD20-051    | 45°04'42.6"  | 29°24'40.9"  |
| 674. | Channel Caraorman – enter Puiu lake         | DD18-145    | 45°03'14.6"  | 29°27'49.8"  |
| 675. | Channel Busurca                             | DD18-153    | 45°08'47.9"  | 29°36'24.0"  |
| 676. | Channel Busurca                             | DD19-172    | 45°08'47.6"  | 29°36'23.6"  |
| 677. | Old Danube                                  | DD20-046    | 45°10'39.1"  | 29°21'12.9"  |

|      |                                          |             |               |              |
|------|------------------------------------------|-------------|---------------|--------------|
| 678. | Arm Sf. Gheorghe                         | P01SF05-041 | 45°11'04,9"   | 28°53'26,7"  |
| 679. | Ceatal Sf. Gheorghe Mila 34              | D15-020     | 45°11'16,1"   | 28°53'08,6"  |
| 680. | Ceatal Sf. Gheorghe Mila 34              | D10-020     | 45°11'16,1"   | 28°53'08,6"  |
| 681. | Ceatal Sf. Gheorghe Mila 34              | D14-020     | 45°11'16,1"   | 28°53'08,6"  |
| 682. | Ceatal Sf. Gheorghe - km 108             | DD18-137    | 45°10'43,5"   | 28°53'48,2"  |
| 683. | Ceatal Sf. Gheorghe - km 108             | D1-17-024   | 45°10'43,5"   | 28°53'48,2"  |
| 684. | Ceatal Sf. Gheorghe - km 108             | D15-027     | 45°10'43,5"   | 28°53'48,2"  |
| 685. | Ceatal Sf. Gheorghe - km 108             | D14-023     | 45°10'43,5"   | 28°53'48,2"  |
| 686. | Ceatal Sf. Gheorghe - km 108             | DD20-031    | 45°10'43,5"   | 28°53'48,2"  |
| 687. | Ceatal Sf. Gheorghe - km 108             | DD20-118    | 45°10'43,5"   | 28°53'48,2"  |
| 688. | Arm Sf. Gheorghe – Downstream<br>Dunavăț | DD18-185    | 45°01'06.4"   | 29°16'38.0"  |
| 689. | Arm Sf. Gheorghe                         | DD18-133    | 45°11'29.7"   | 28°52'46.3"  |
| 690. | Arm Sf. Gheorghe                         | H16-024     | 45°02'16,6"   | 29°13'53,5"  |
| 691. | Arm Sf. Gheorghe                         | G1-16-003   | 45°02'41,3"   | 29°11'22,5"  |
| 692. | Arm Sf. Gheorghe                         | A1-16-008   | 45°04'14,9"   | 29°07'47,3"  |
| 693. | Arm Sf. Gheorghe                         | G1-16-001   | 45°02'45,9"   | 29°11'24,5"  |
| 694. | Arm Sf. Gheorghe                         | PO1SF09-41  | 45°11'04,9"   | 28°53'26,7"  |
| 695. | Arm Sf. Gheorghe                         | PO6SU09-23  | 45°10'32,4 "N | 29°21'17,0"E |
| 696. | Arm Sf. Gheorghe – Km 57+500             | DD19-159    | 45°02'21.6"   | 29°16'11.7"  |
| 697. | Arm Sf. Gheorghe - Km 54 + 500m          | DD19-047    | 45°01'31.3"   | 29°16'11.0"  |
| 698. | Arm Sf. Gheorghe - km 54                 | DD20-125    | 45°01'08.0"   | 29°16'36.2"  |
| 699. | Arm Sf. Gheorghe – Km 49 + 500m          | DD19-040    | 45°00'23.7"   | 29°17'07.4"  |
| 700. | Arm Sf. Gheorghe – Km 49                 | DD19-035    | 44°59'52.6"   | 29°17'54.2"  |
| 701. | Arm Sf. Gheorghe – Km 49                 | DD19-144    | 44°59'50.8"   | 29°17'59.4"  |
| 702. | Arm Sf. Gheorghe – km 44                 | P32-34      | 44°58'08,3"   | 29°18'59,6"  |
| 703. | Sf. Gheorghe Arm km 8                    | D15-038     | 44°54'50.1"   | 29°33'35.0"  |

|      |                                            |           |             |             |
|------|--------------------------------------------|-----------|-------------|-------------|
| 704. | Sf. Gheorghe Arm km 8                      | D11-038   | 44°54'50.1" | 29°33'35.0" |
| 705. | Sf. Gheorghe Arm km 1                      | D15-036   | 44°53'01.4" | 29°36'39.3" |
| 706. | Sf. Gheorghe Arm km 1                      | D15-035   | 44°53'01.4" | 29°36'39.3" |
| 707. | Sf. Gheorghe Arm km 1                      | D11-035   | 44°53'01.4" | 29°36'39.3" |
| 708. | Rectification channel                      | G3-16-004 | 45°02'57,7" | 29°10'56,4" |
| 709. | Rectification channel                      | L3-17-037 | 45°00'59,4" | 29°16'49,4" |
| 710. | Old Danube (Meander)                       | C16-013   | 45°05'53,0" | 29°07'36,1" |
| 711. | Old Danube (Meander)                       | G2-16-014 | 45°03'07,2" | 29°11'15,9" |
| 712. | Old Danube (Meander)                       | G2-17-016 | 45°03'12,1" | 29°11'11,1" |
| 713. | Old Danube (Meander)                       | N2-17-041 | 45°00'27,1" | 29°17'12,1" |
| 714. | Old Danube (Meander)                       | PM05-21B  | 45°10'49,8" | 29°21'51,6" |
| 715. | Old Danube (Meander)                       | PM05-21A  | 45°10'41,4" | 29°21'05,1" |
| 716. | Old Danube (Meander)                       | PM09-21B  | 45°10'49,8" | 29°21'51,6" |
| 717. | Old Danube (Meander)                       | PM09-21A  | 45°10'41,4" | 29°21'05,1" |
| 718. | Old Danube (Meander)                       | P51-53    | 44°57'47,3" | 29°28'40,9" |
| 719. | Arm Sf. Gheorghe - enter                   | P25-27    | 45°01'06.4" | 29°16'42,7" |
| 720. | Arm Sf. Gheorghe – Big M                   | P11-13    | 45°06'32,9" | 29°10'16,1" |
| 721. | Cut off 2-Est                              | DD18-181  | 45°00'26.5" | 29°17'03.0" |
| 722. | Gârla Turcească/Old Lighthouse             | DD18-170  | 44°50'26.3" | 29°35'25.1" |
| 723. | Sacalin Bay                                | DD18-172  | 44°48'14.0" | 29°32'45.5" |
| 724. | Arm Sf. Gheorghe - Enter Channel<br>Tătaru | DD18-167  | 44°53'54.4" | 29°34'41.6" |
| 725. | Channel Tătaru/ Central Channel            | DD18-168  | 44°54'35.0" | 29°35'20.3" |
| 726. | Channel Tătaru                             | DD18-096  | 45°24'36.5" | 29°16'38.6" |
| 727. | Arm Tătaru                                 | DD19-007  | 45°24'36.1" | 29°16'38.6" |
| 728. | Arm Tătaru                                 | DD20-007  | 45°24'36.4" | 29°16'38.8" |
| 729. | Sacalin Bay -Channel Ciotic                | DD20-130  | 44°49'38.6" | 29°34'29.2" |

|      |                             |              |              |             |
|------|-----------------------------|--------------|--------------|-------------|
| 730. | Channel Mustaca-Lake Razelm | DD20-140     | 44°53'35.9"  | 29°02'05.8" |
| 731. | Uzlina Channel              | CU1-16-019   | 45°04'21,1 " | 29°13'33,9" |
| 732. | Uzlina Channel              | CU1-17-019   | 45°04'21,1 " | 29°13'33,9" |
| 733. | Uzlina Lake                 | L02 Van Veen | 45°05'13,2"  | 29°15'30,2" |
| 734. | Uzlina Lake                 | L02 Net      | 45°05'13,2"  | 29°15'30,2" |
| 735. | Uzlina Lake                 | LU2-16-022   | 45°05'33,5"  | 29°16'00,0" |
| 736. | Channel 44                  | L07          | 44°58'02,6"  | 29°18'39,6" |
